# Supplementary material for: Non Methane Hydrocarbon (C2–C8) sources and sinks around theArabian Peninsula
Source: Copernicus journal article supplement (doi:10.5194/acp-2019-92), 2019-02-14
Supplement: Supplementary file 1 [file acp-2019-92-supplement.pdf]

Supplement of:

## **Non Methane Hydrocarbon (C2-C8) sources and sinks around the Arabian Peninsula**

Efstratios Bourtsoukidis<sup>1</sup>, Lisa Ernle<sup>1</sup>, John N. Crowley<sup>1</sup>, Jos Lelieveld<sup>1</sup>, Jean-Daniel Paris<sup>2</sup>, Andrea Pozzer<sup>1</sup>, David Walter<sup>3</sup>, and Jonathan Williams<sup>1</sup>

<sup>1</sup>Department of Atmospheric Chemistry, Max Planck Institute for Chemistry, Mainz, 55128, Germany

<sup>2</sup>Laboratoire des Sciences du Climat et de l'Environnement, CEA-CNRS-UVSQ, UMR8212, IPSL, Gif-sur-Yvette, France

<sup>3</sup>Department of Multiphase Chemistry, Max Planck Institute for Chemistry, Mainz, 55128, Germany

*Correspondence to:* Efstratios Bourtsoukidis (e.bourtsoukidis@mpic.de)

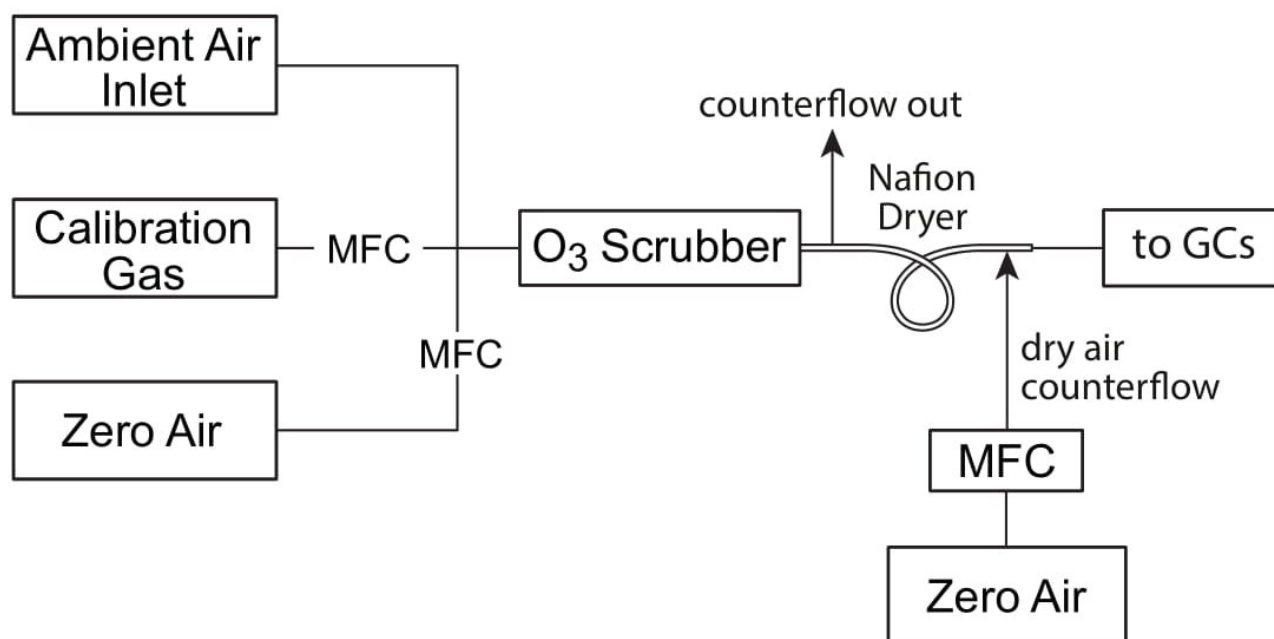

**Figure S1.** Sampling configuration of ambient air and calibration mixture.

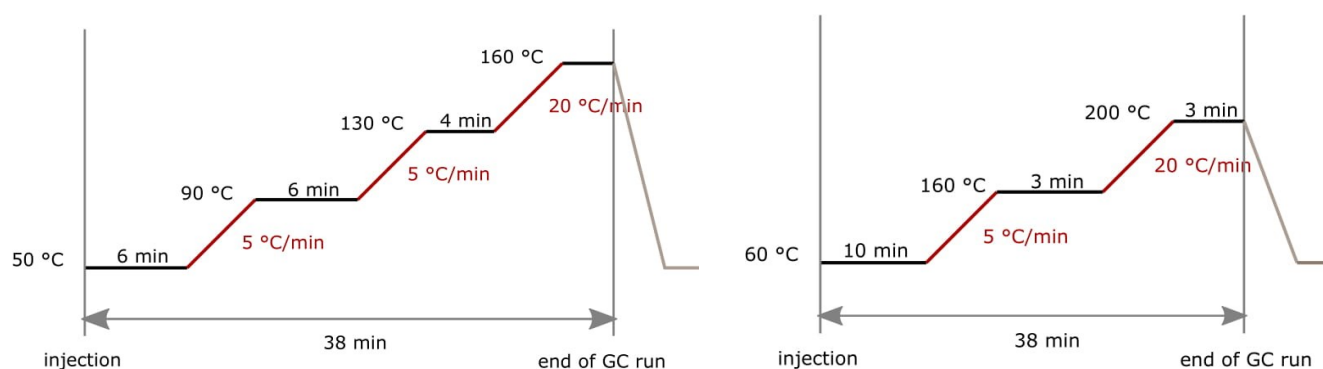

**Figure S2.** Temperature program for GC5000VOC (left) and GC5000BTX.

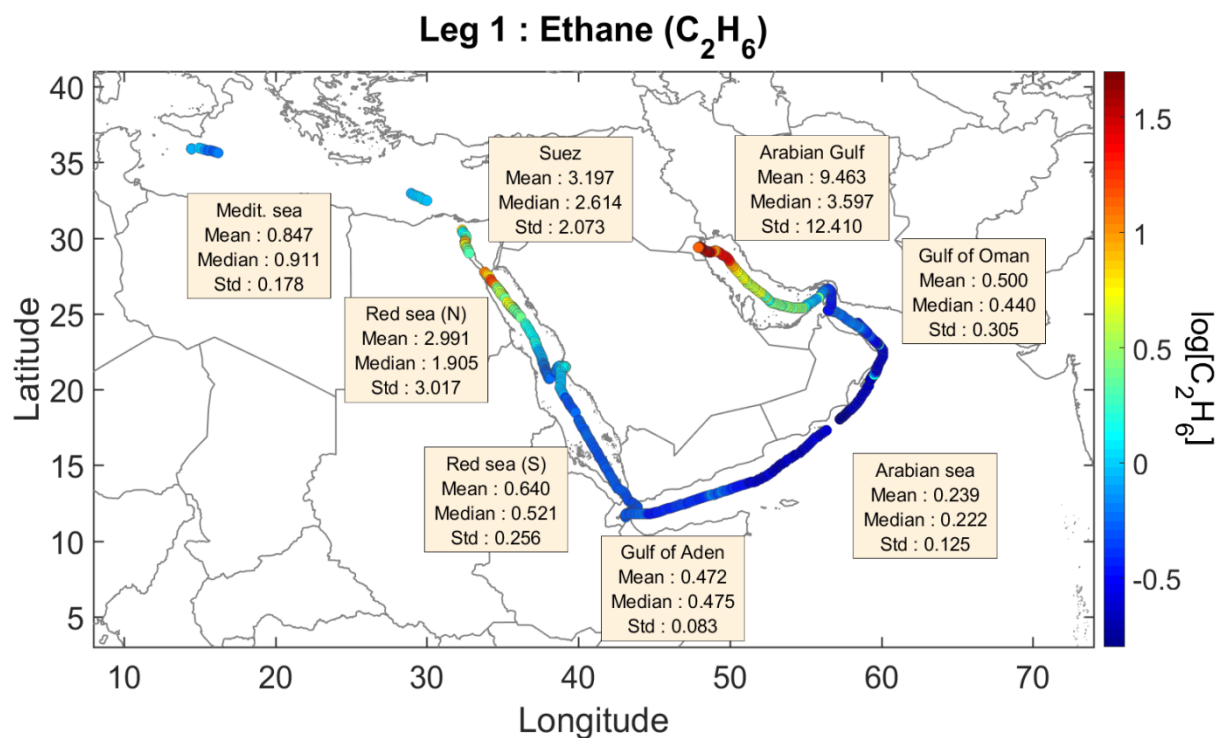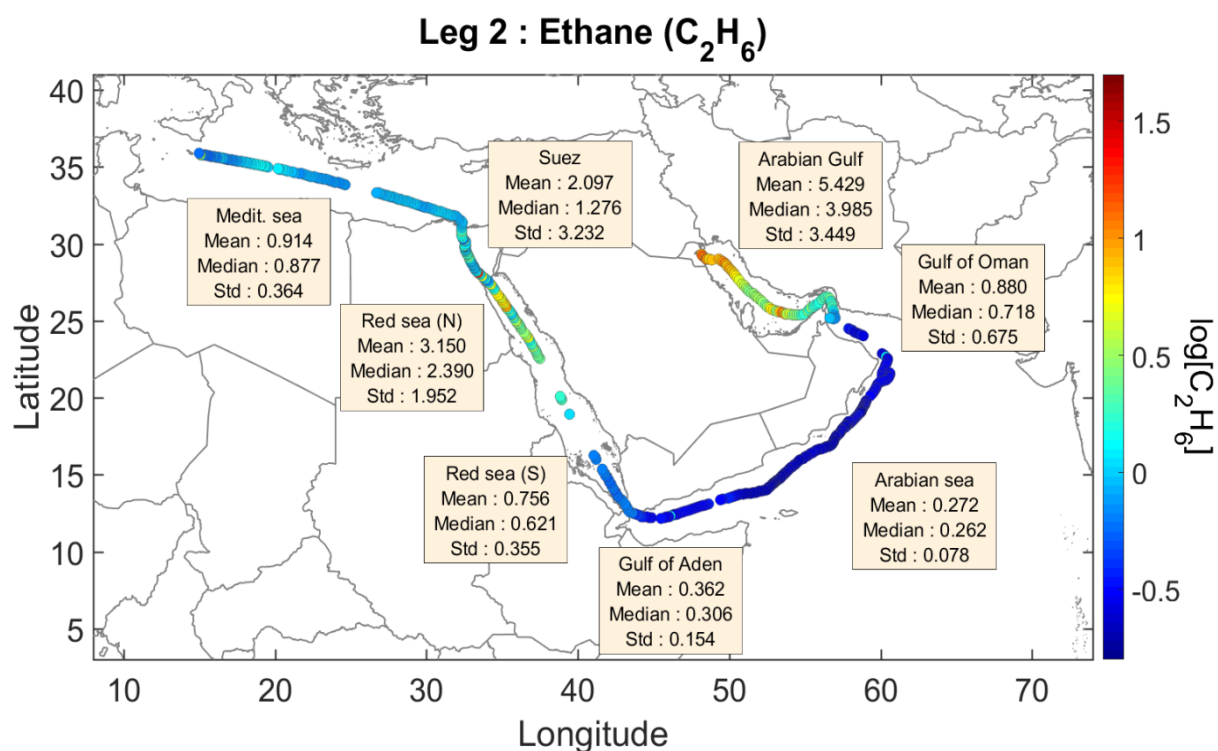

**Figure S3.** Ethane volume mixing ratios (in ppb) for leg 1 (up) and leg 2 (down). Data from periods that have been influenced by KI ship exhaust have not been removed.

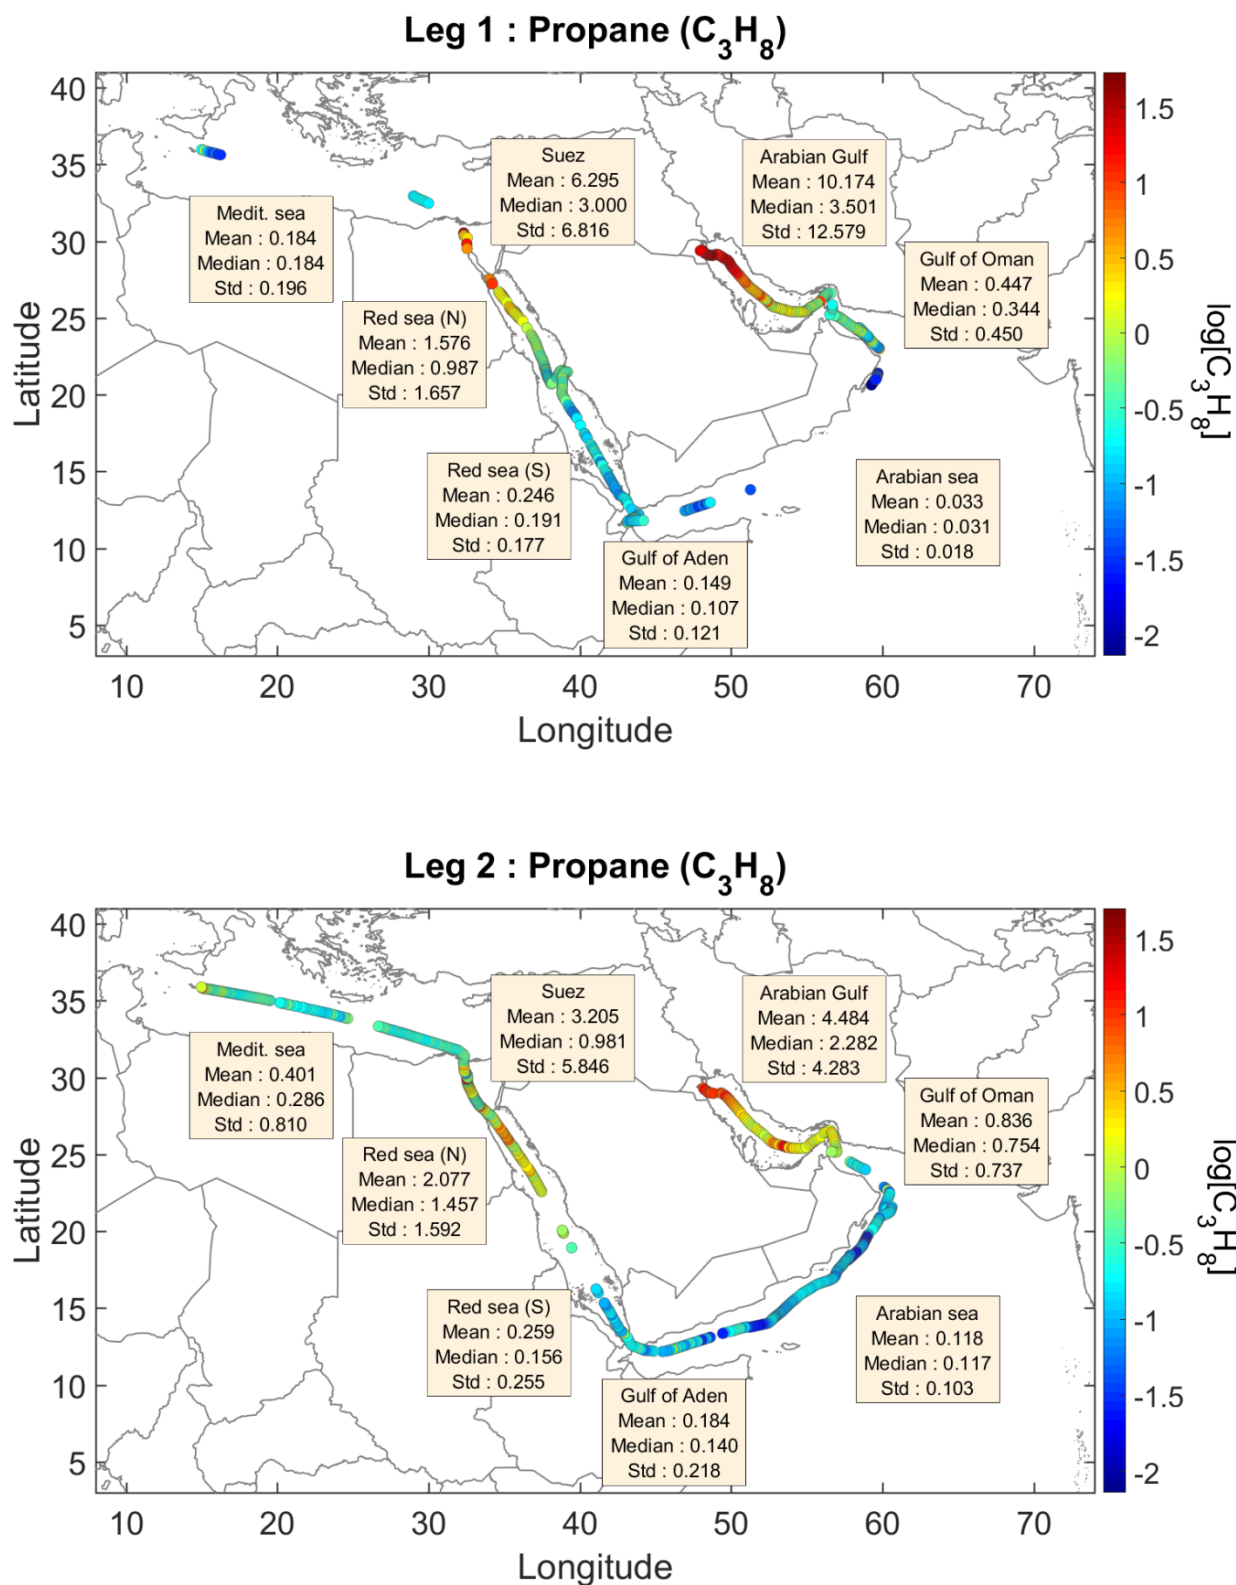

**Figure S4.** Propane volume mixing ratios (in ppb) for leg 1 (up) and leg 2 (down). Data from periods that have been influenced by KI ship exhaust have been removed.



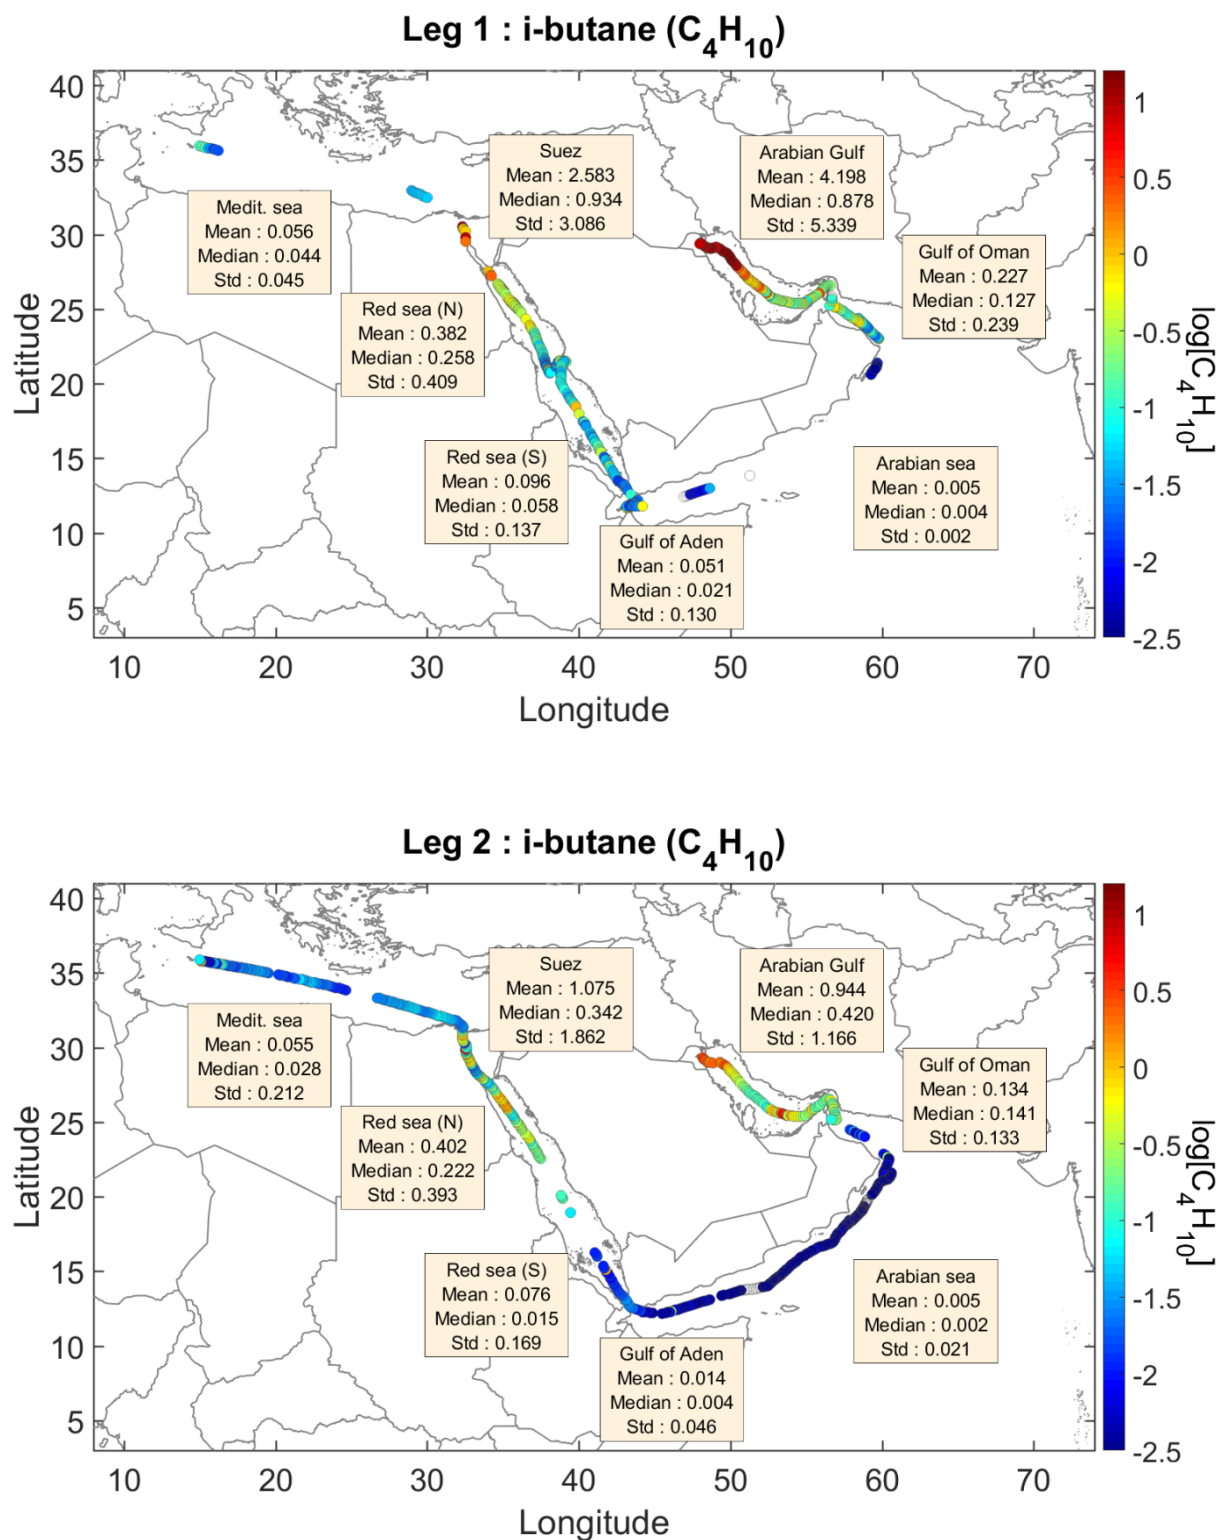

**Figure S5.** I-butane volume mixing ratios (in ppb) for leg 1 (up) and leg 2 (down). Data from periods that have been influenced by KI ship exhaust have been removed.

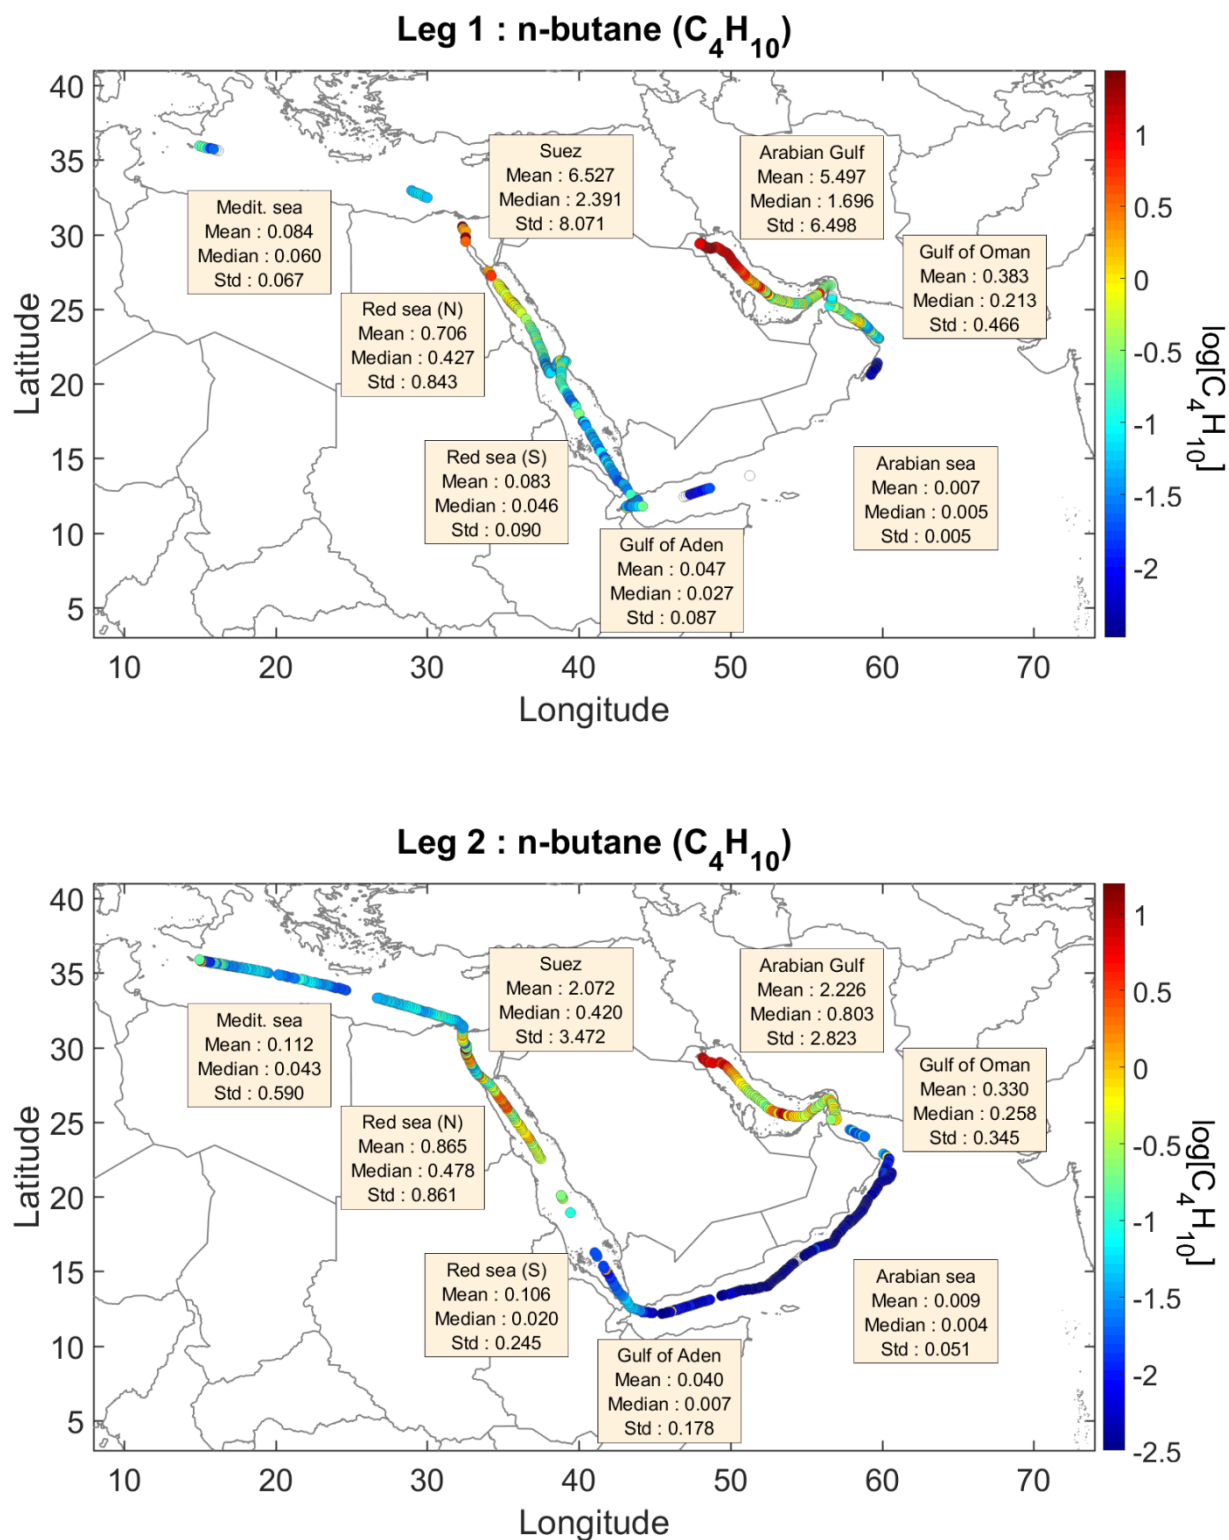

**Figure S6.** N-butane volume mixing ratios (in ppb) for leg 1 (up) and leg 2 (down). Data from periods that have been influenced by KI ship exhaust have been removed.

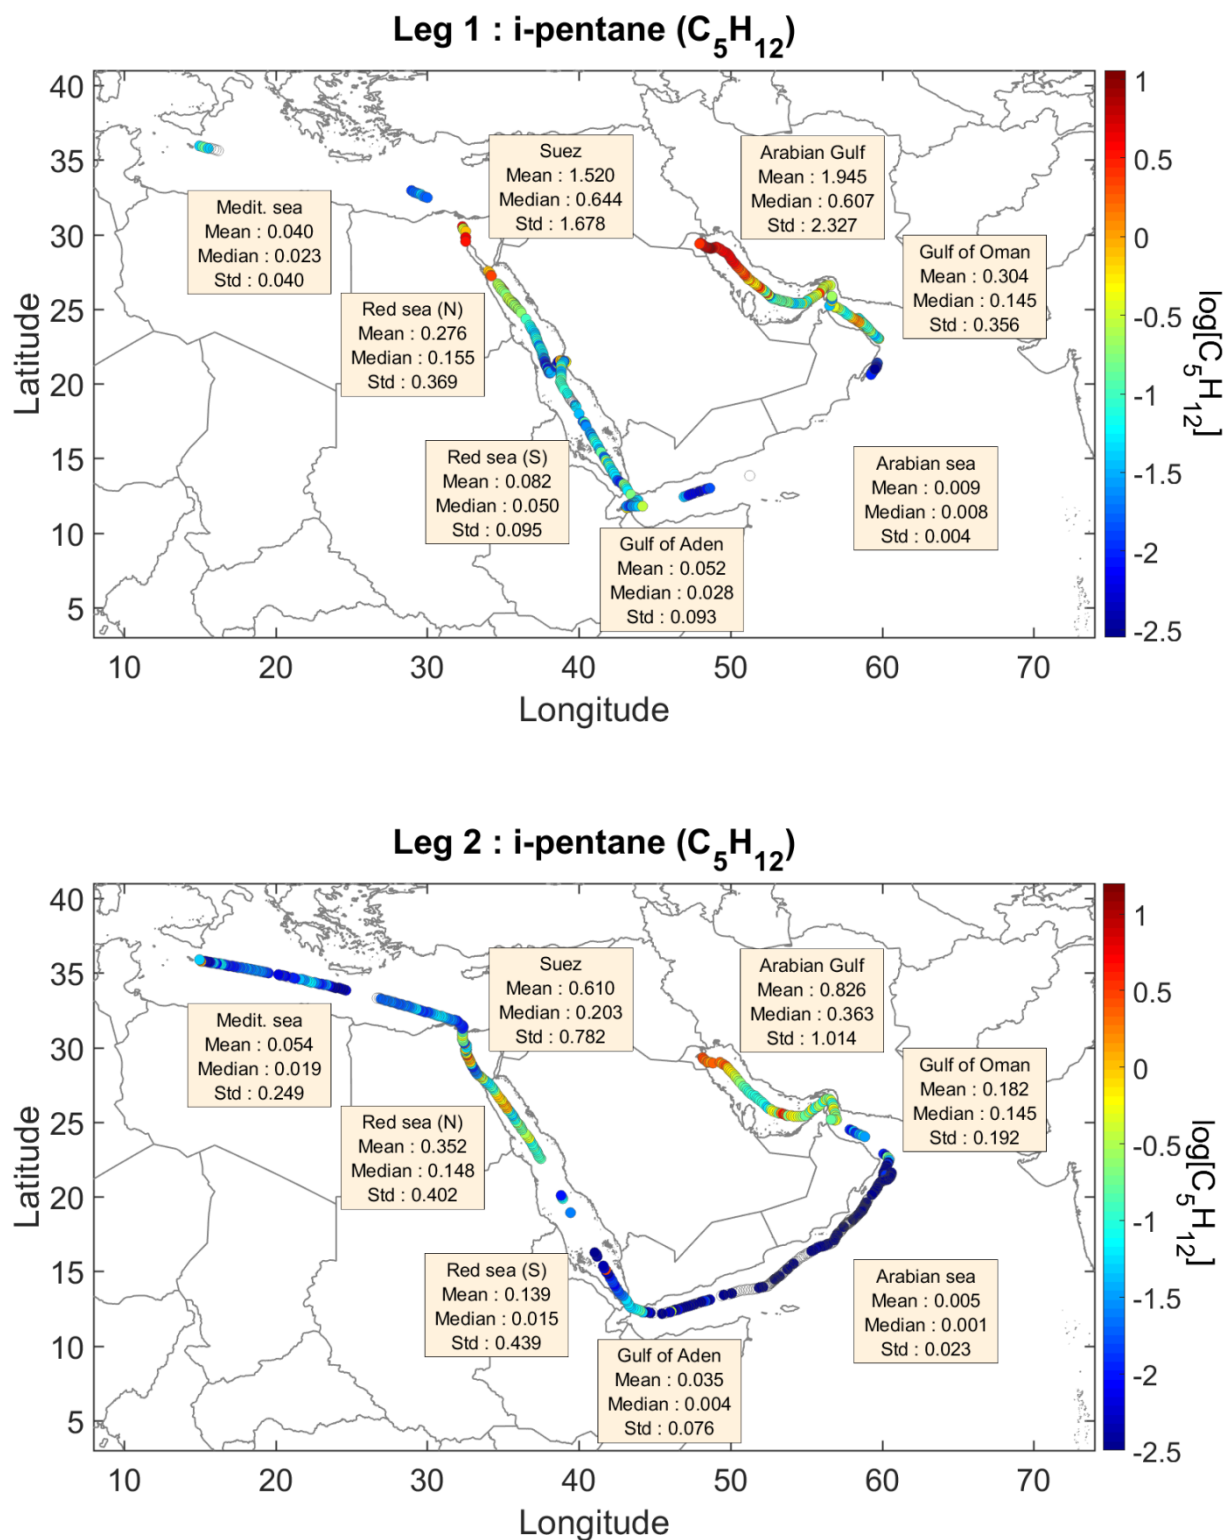

**Figure S7.** I-pentane volume mixing ratios (in ppb) for leg 1 (up) and leg 2 (down). Data from periods that have been influenced by KI ship exhaust have been removed.

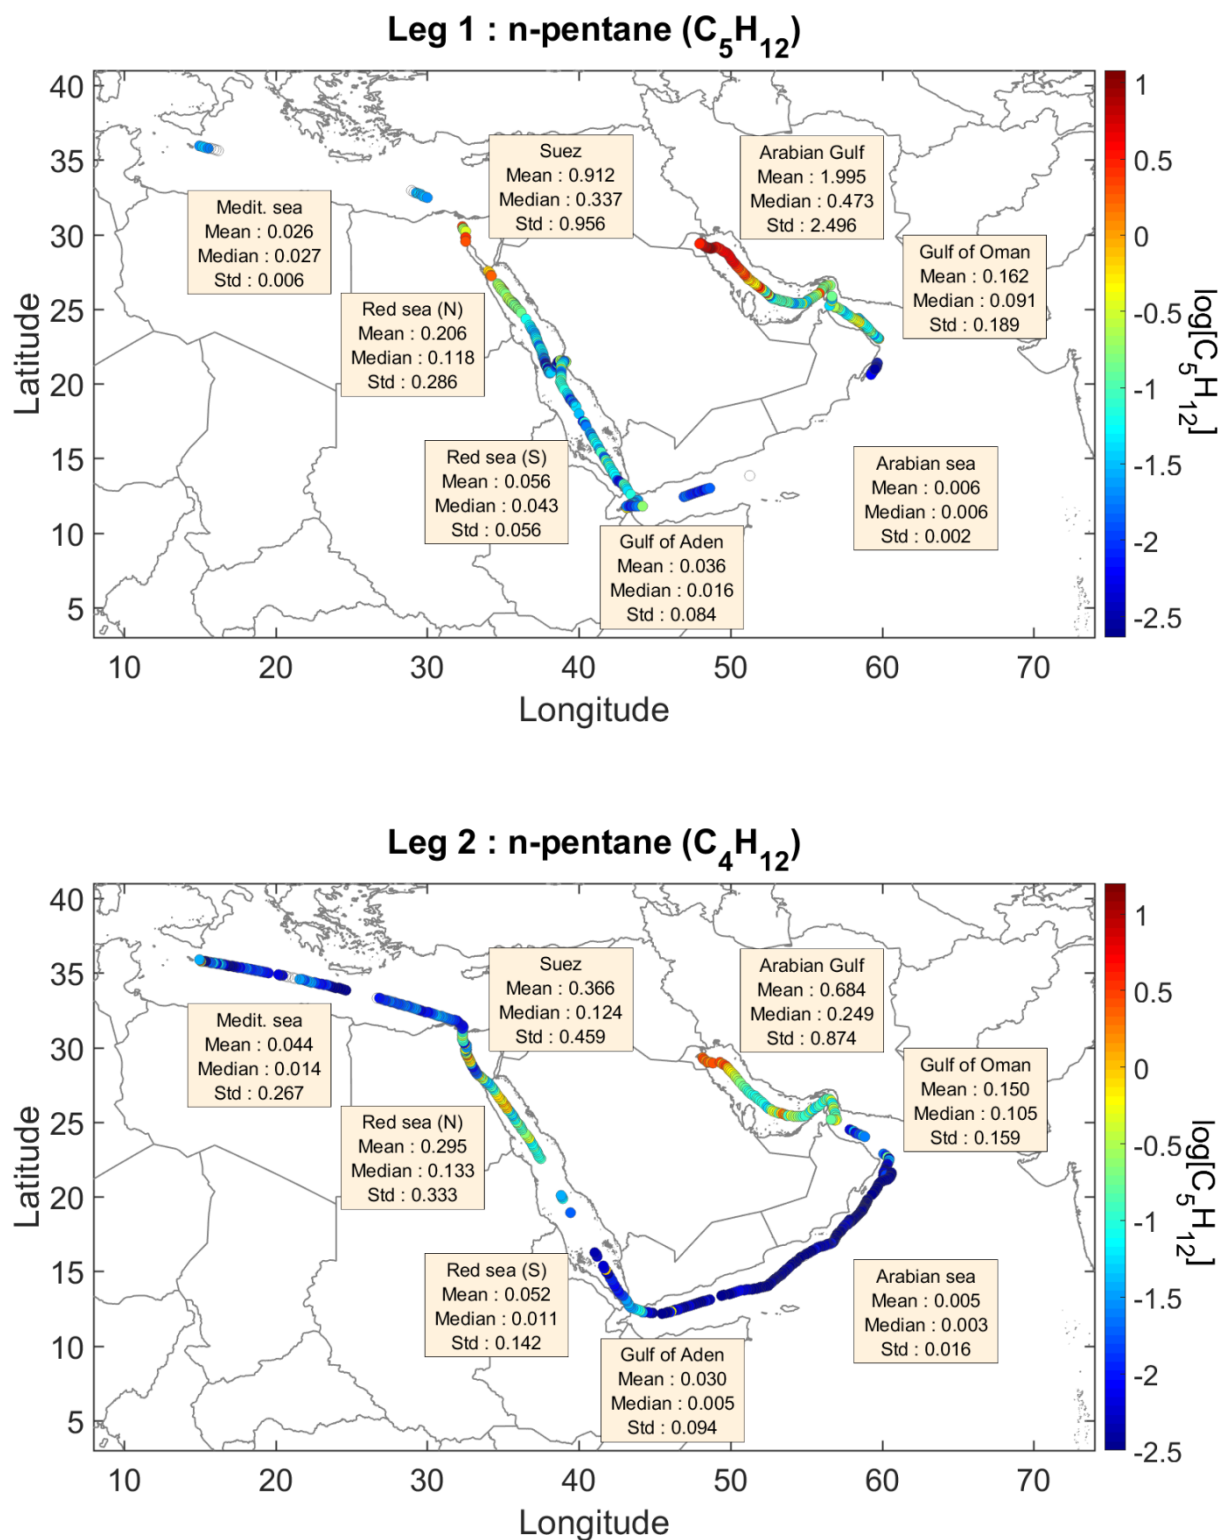

**Figure S8.** N-pentane volume mixing ratios (in ppb) for leg 1 (up) and leg 2 (down). Data from periods that have been influenced by KI ship exhaust have been removed.

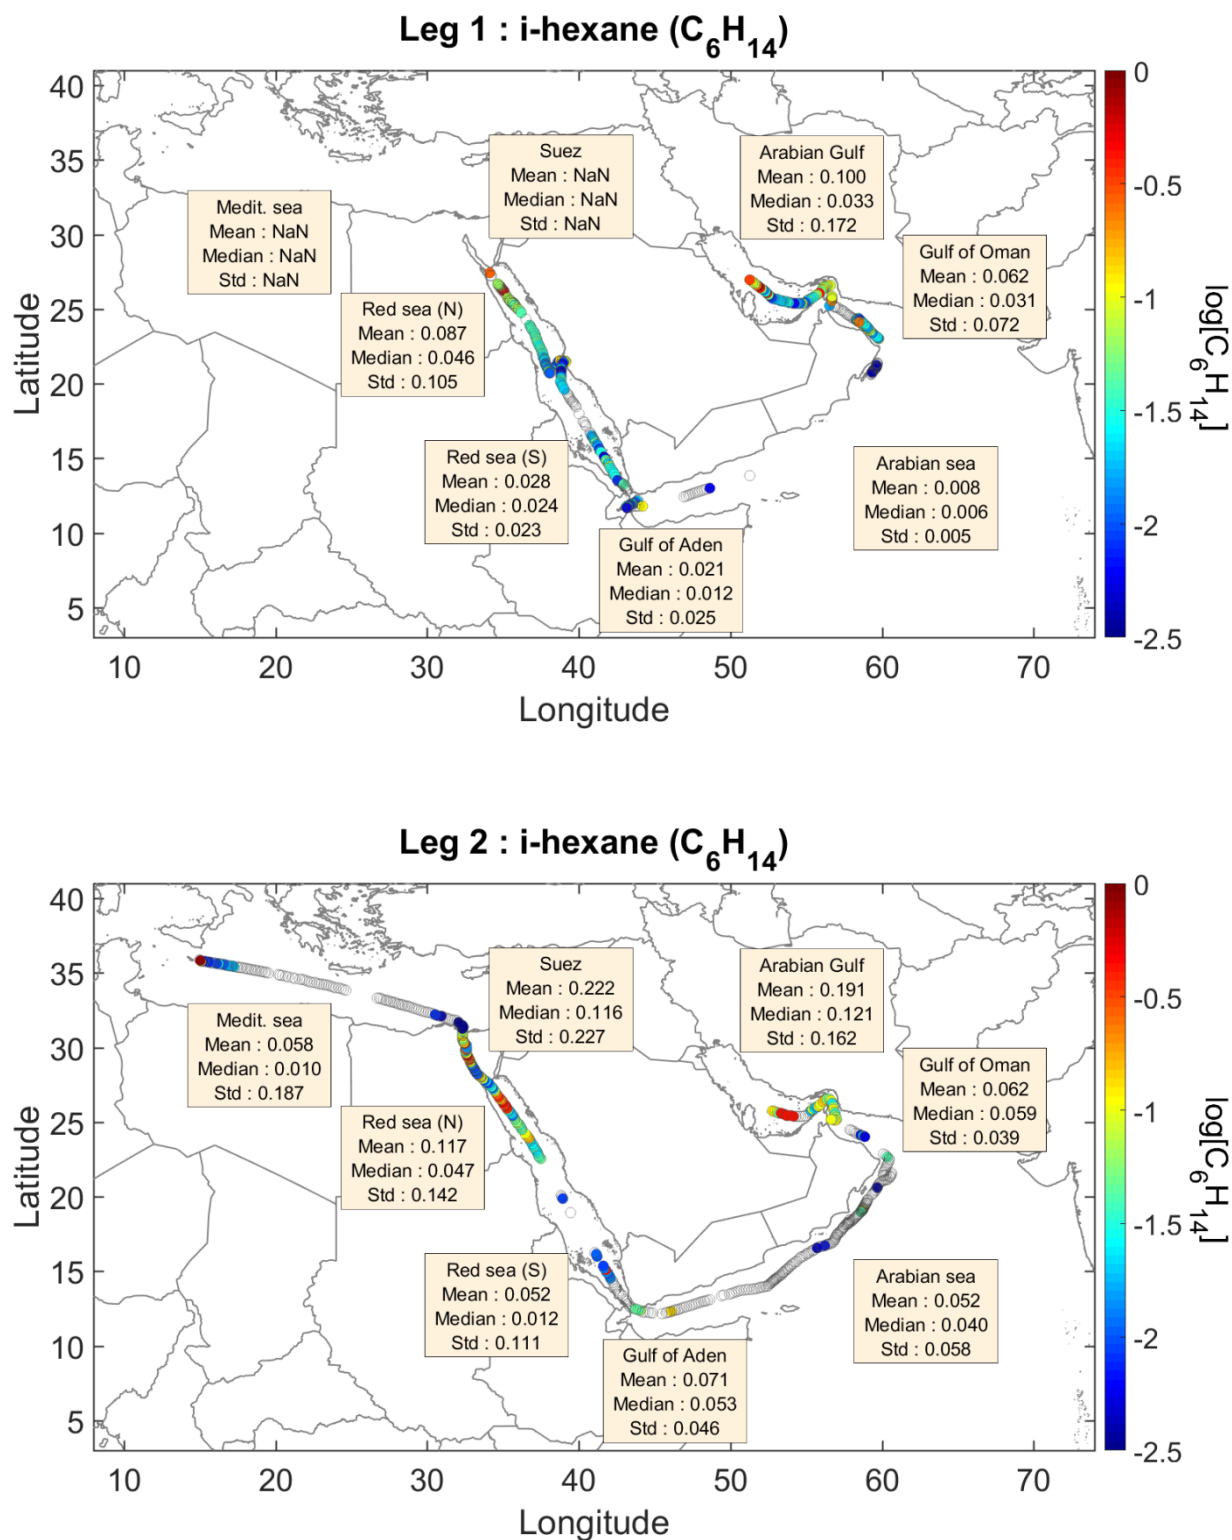

**Figure S9.** I-hexane (2-methylpentane) volume mixing ratios (in ppb) for leg 1 (up) and leg 2 (down). Data from periods that have been influenced by KI ship exhaust have been removed. No data were obtained at the north part of Persian Gulf for both legs.



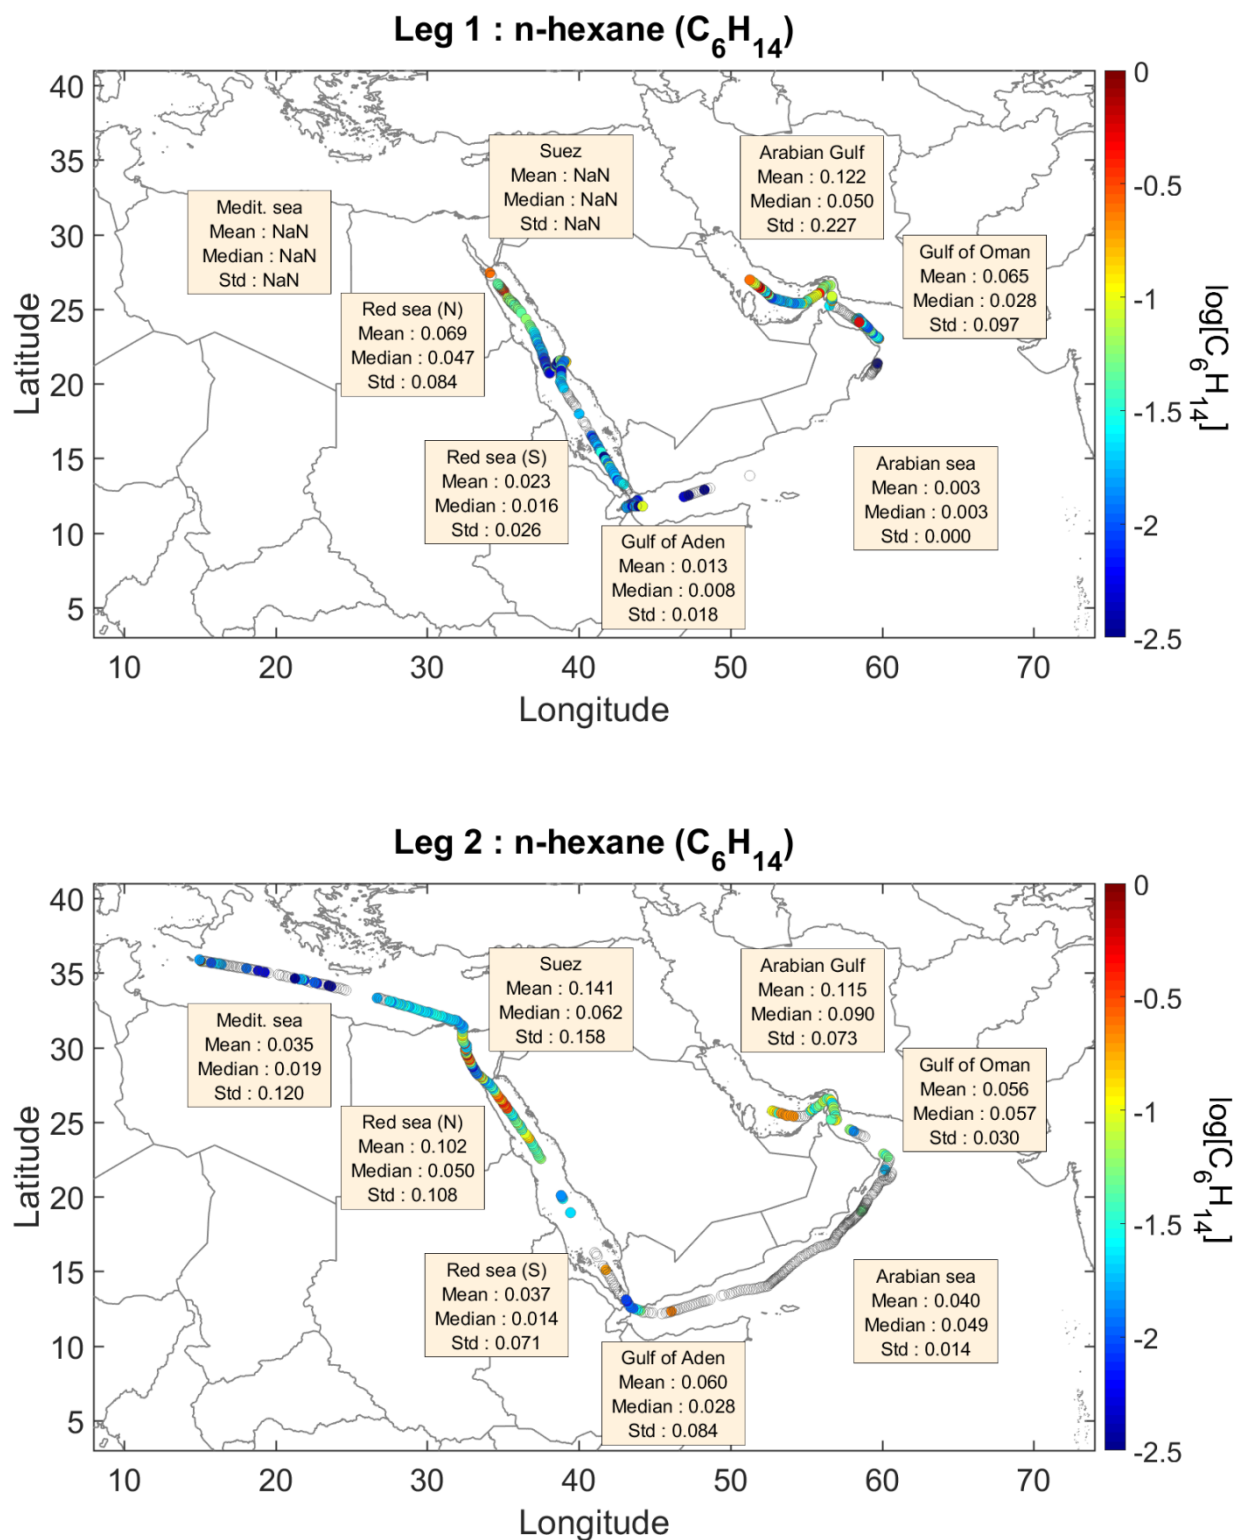

**Figure S10.** N-hexane volume mixing ratios (in ppb) for leg 1 (up) and leg 2 (down). Data from periods that have been influenced by KI ship exhaust have been removed. No data were obtained at the north part of Persian Gulf for both legs.

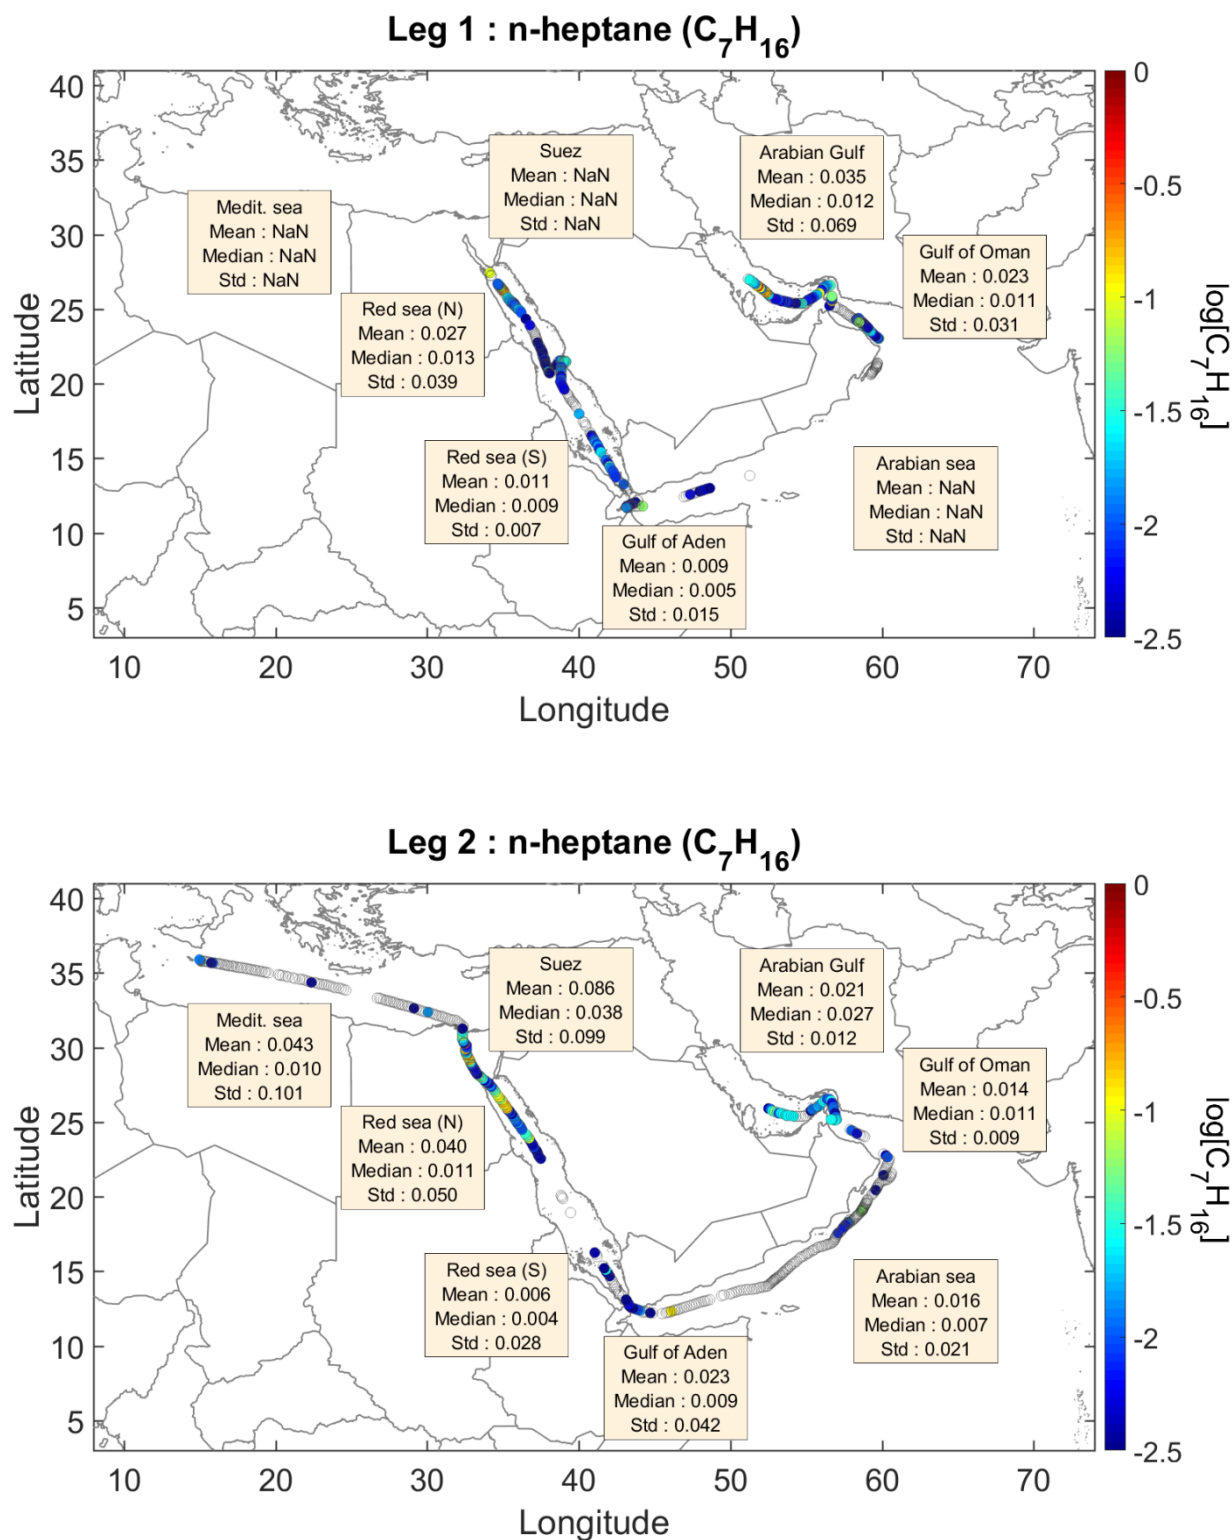

**Figure S11.** N-hexane volume mixing ratios (in ppb) for leg 1 (up) and leg 2 (down). Data from periods that have been influenced by KI ship exhaust have been removed. No data were obtained at the north part of Persian Gulf for both legs.

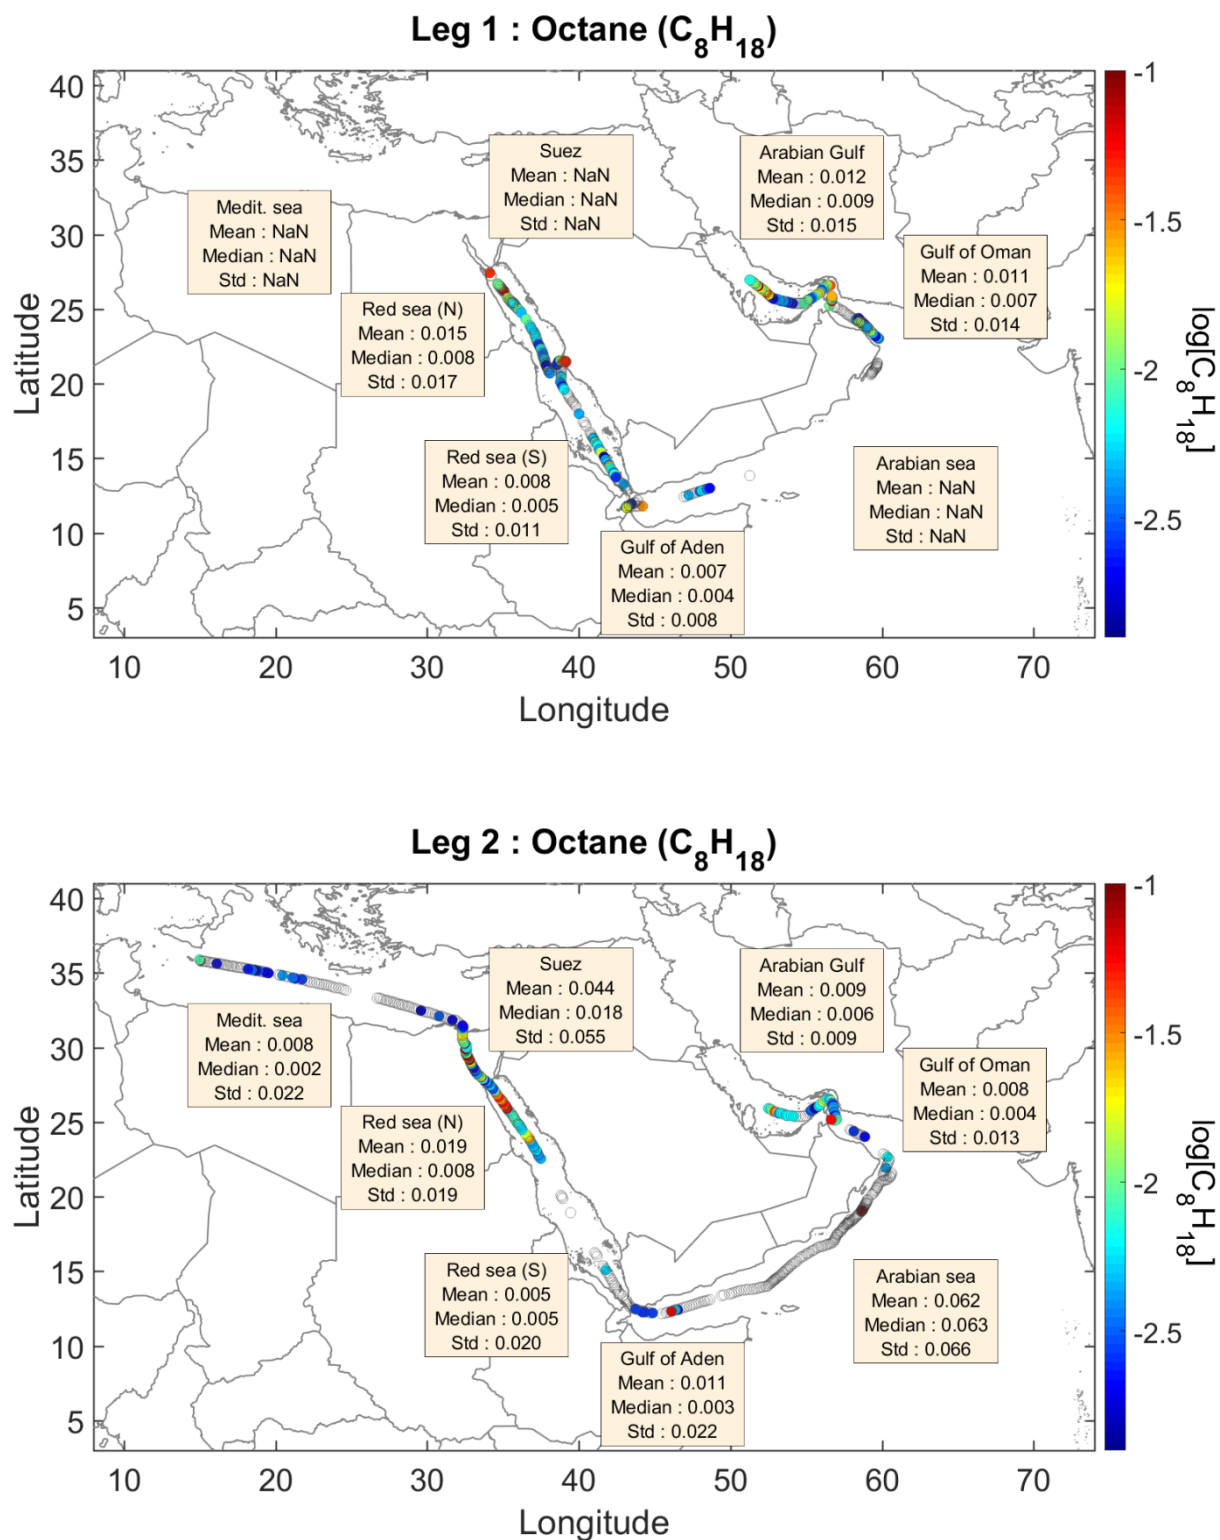

**Figure S12.** Octane volume mixing ratios (in ppb) for leg 1 (up) and leg 2 (down). Data from periods that have been influenced by KI ship exhaust have been removed. No data were obtained at the north part of Persian Gulf for both legs.



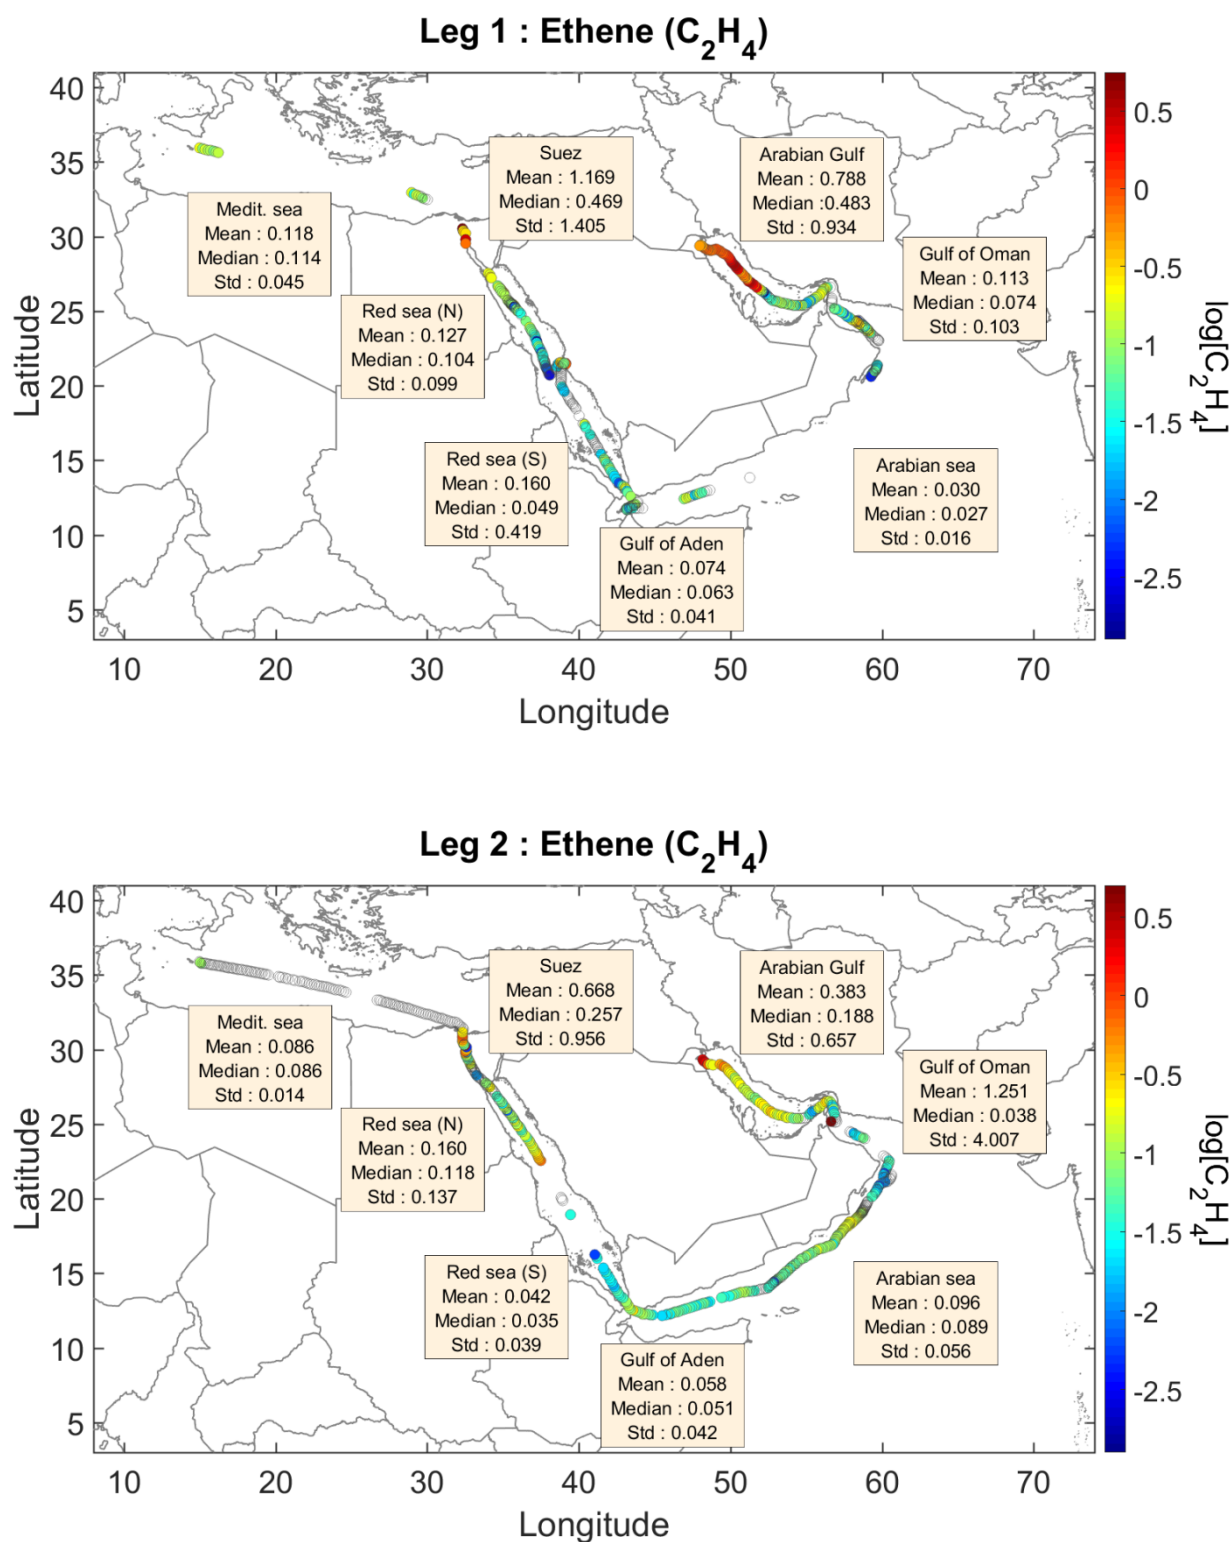

**Figure S13.** Ethene volume mixing ratios (in ppb) for leg 1 (up) and leg 2 (down). Data from periods that have been influenced by KI ship exhaust have been removed.

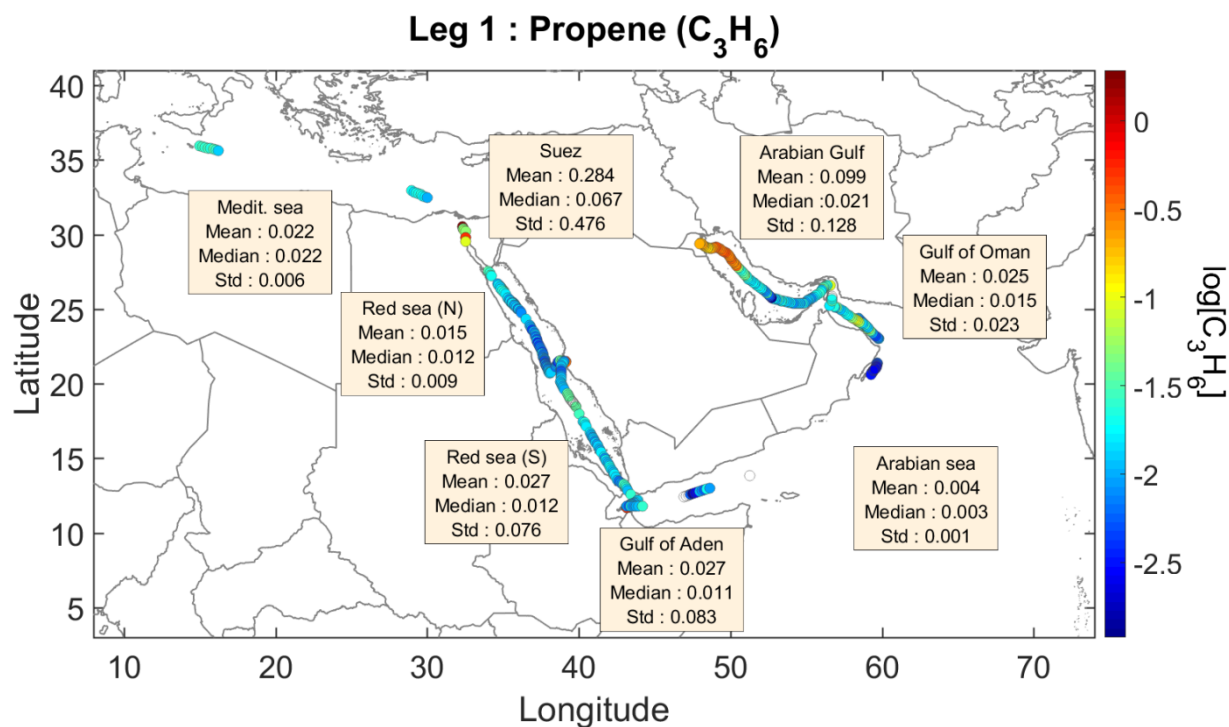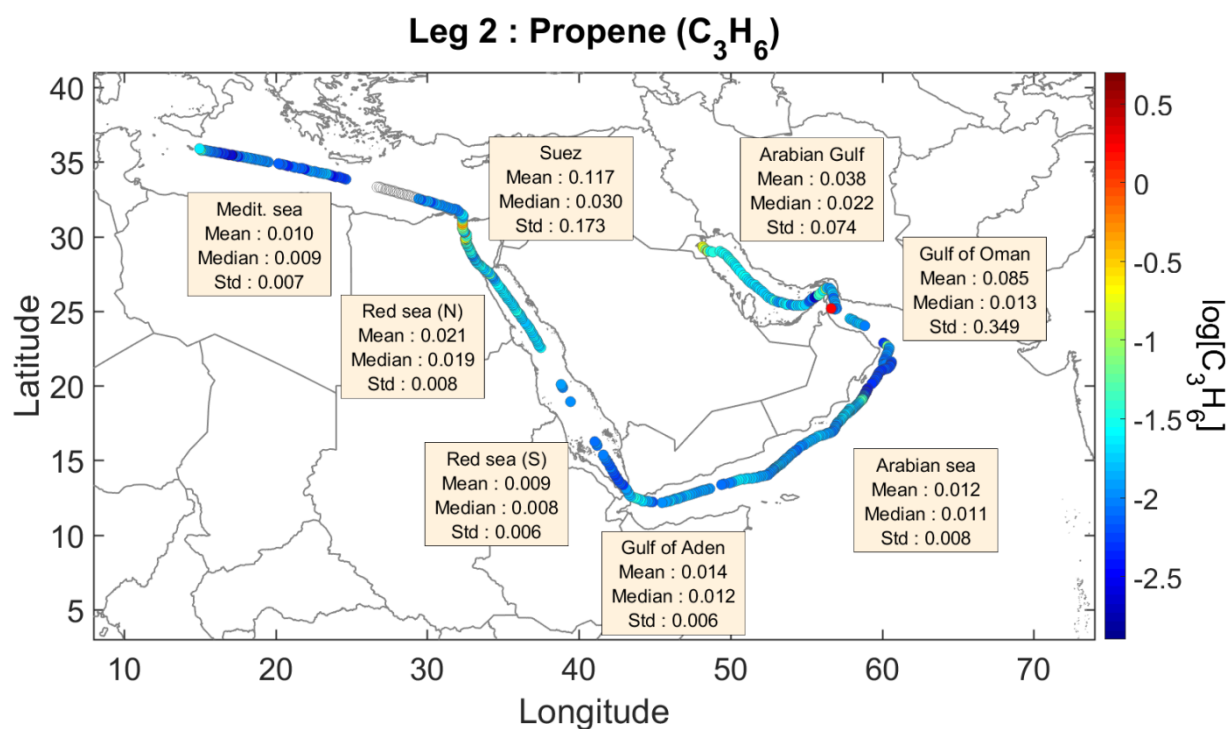

**Figure S14.** Propene volume mixing ratios (in ppb) for leg 1 (up) and leg 2 (down). Data from periods that have been influenced by KI ship exhaust have been removed.

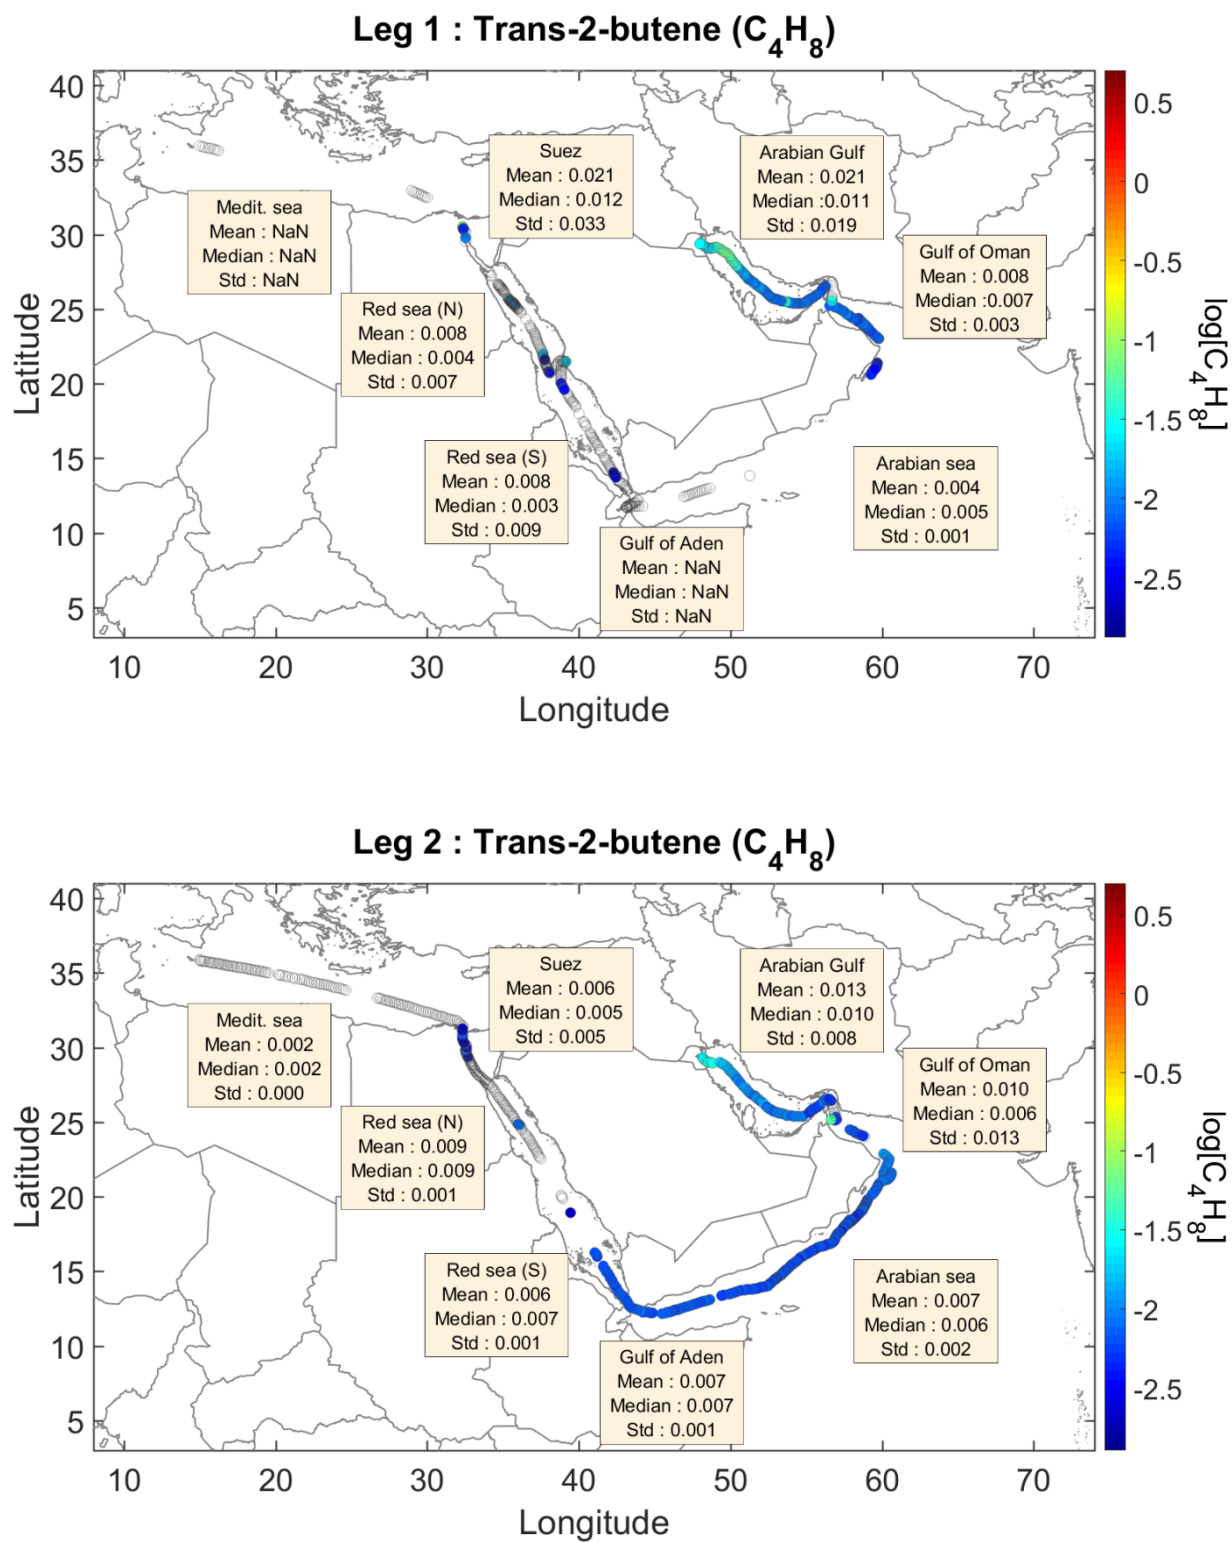

**Figure S15.** Trans-2-butene volume mixing ratios (in ppb) for leg 1 (up) and leg 2 (down). Data from periods that have been influenced by KI ship exhaust have been removed.

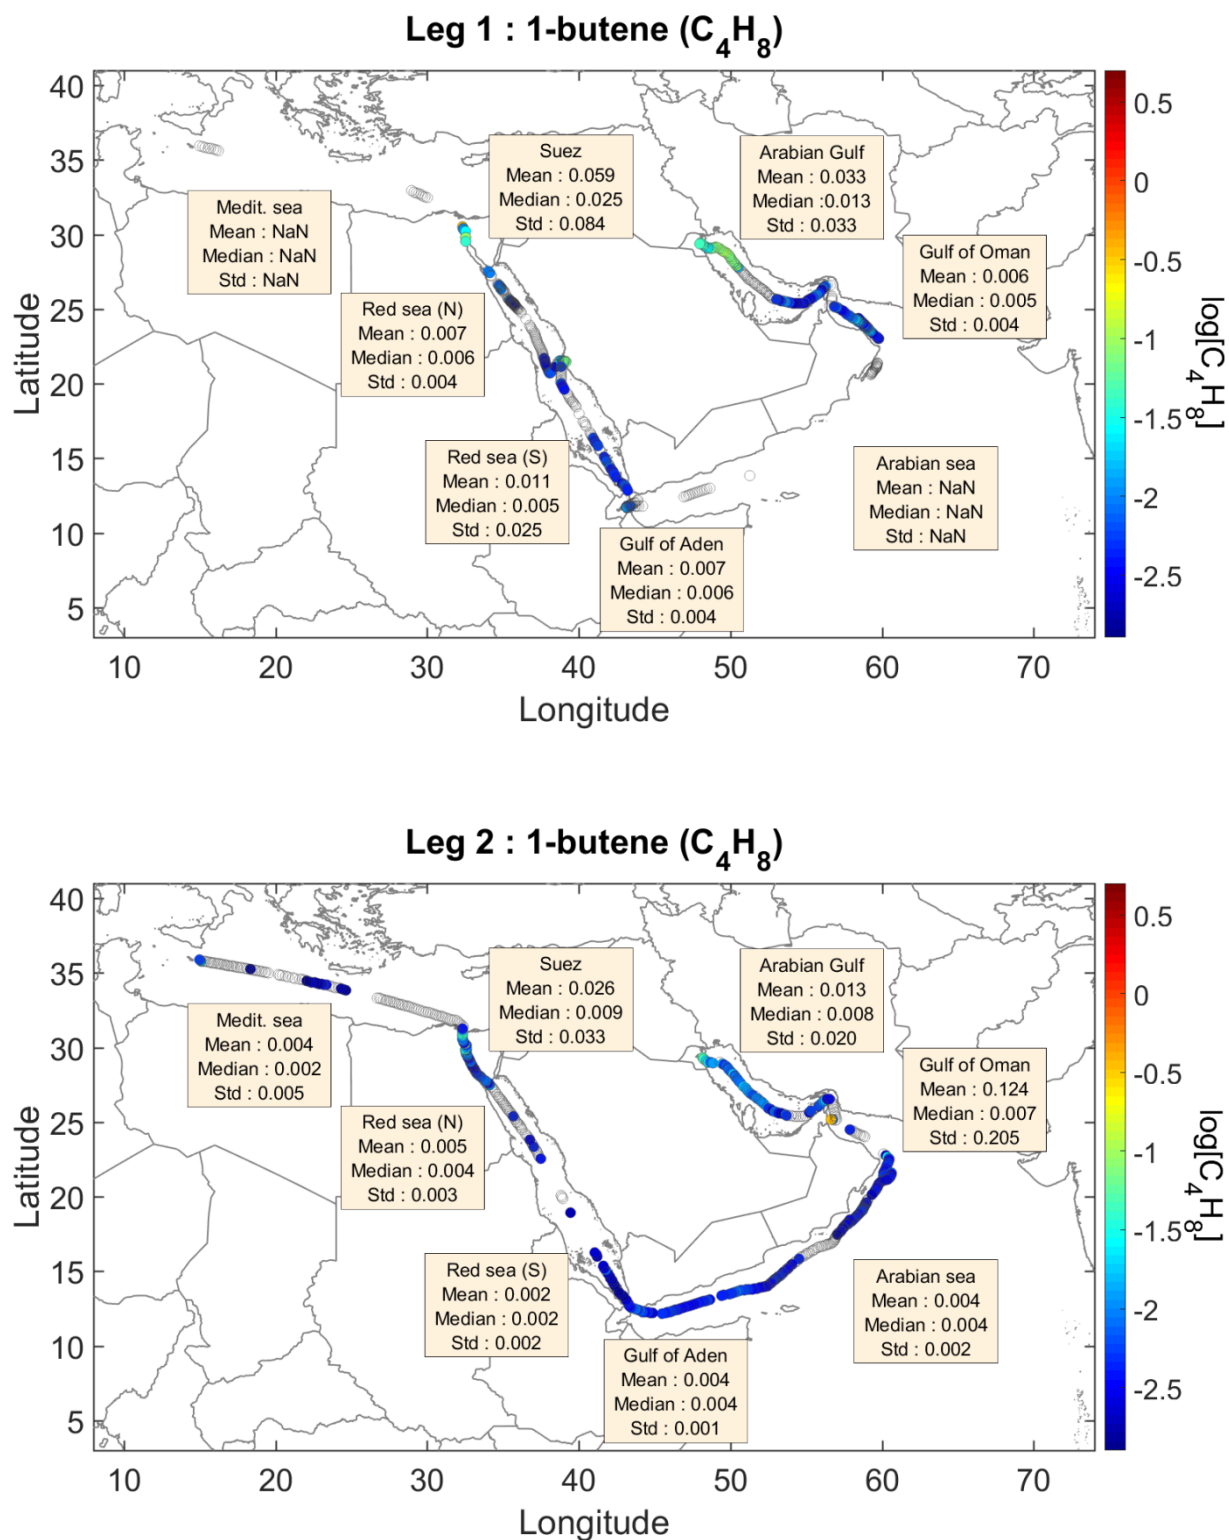

**Figure S16.** 1-butene volume mixing ratios (in ppb) for leg 1 (up) and leg 2 (down). Data from periods that have been influenced by KI ship exhaust have been removed.

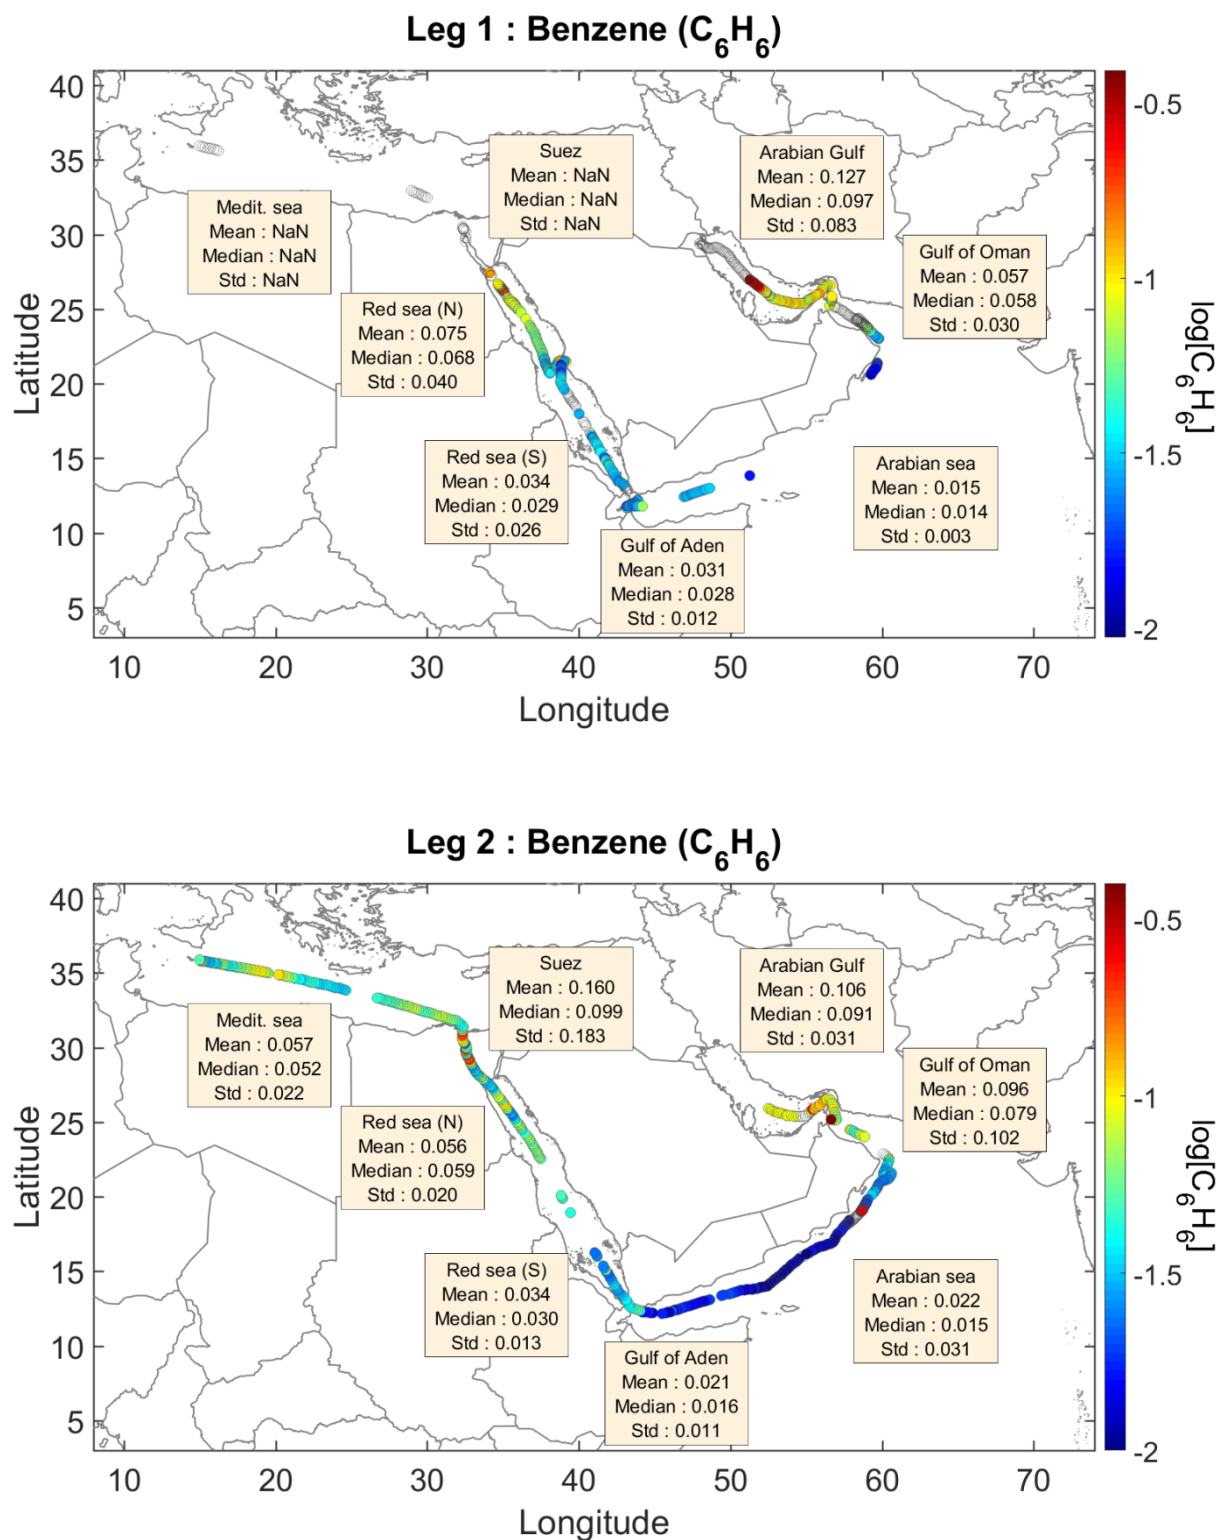

**Figure S17.** Benzene volume mixing ratios (in ppb) for leg 1 (up) and leg 2 (down). Data from periods that have been influenced by KI ship exhaust have been removed. No data were obtained at the north part of Persian Gulf for both legs.



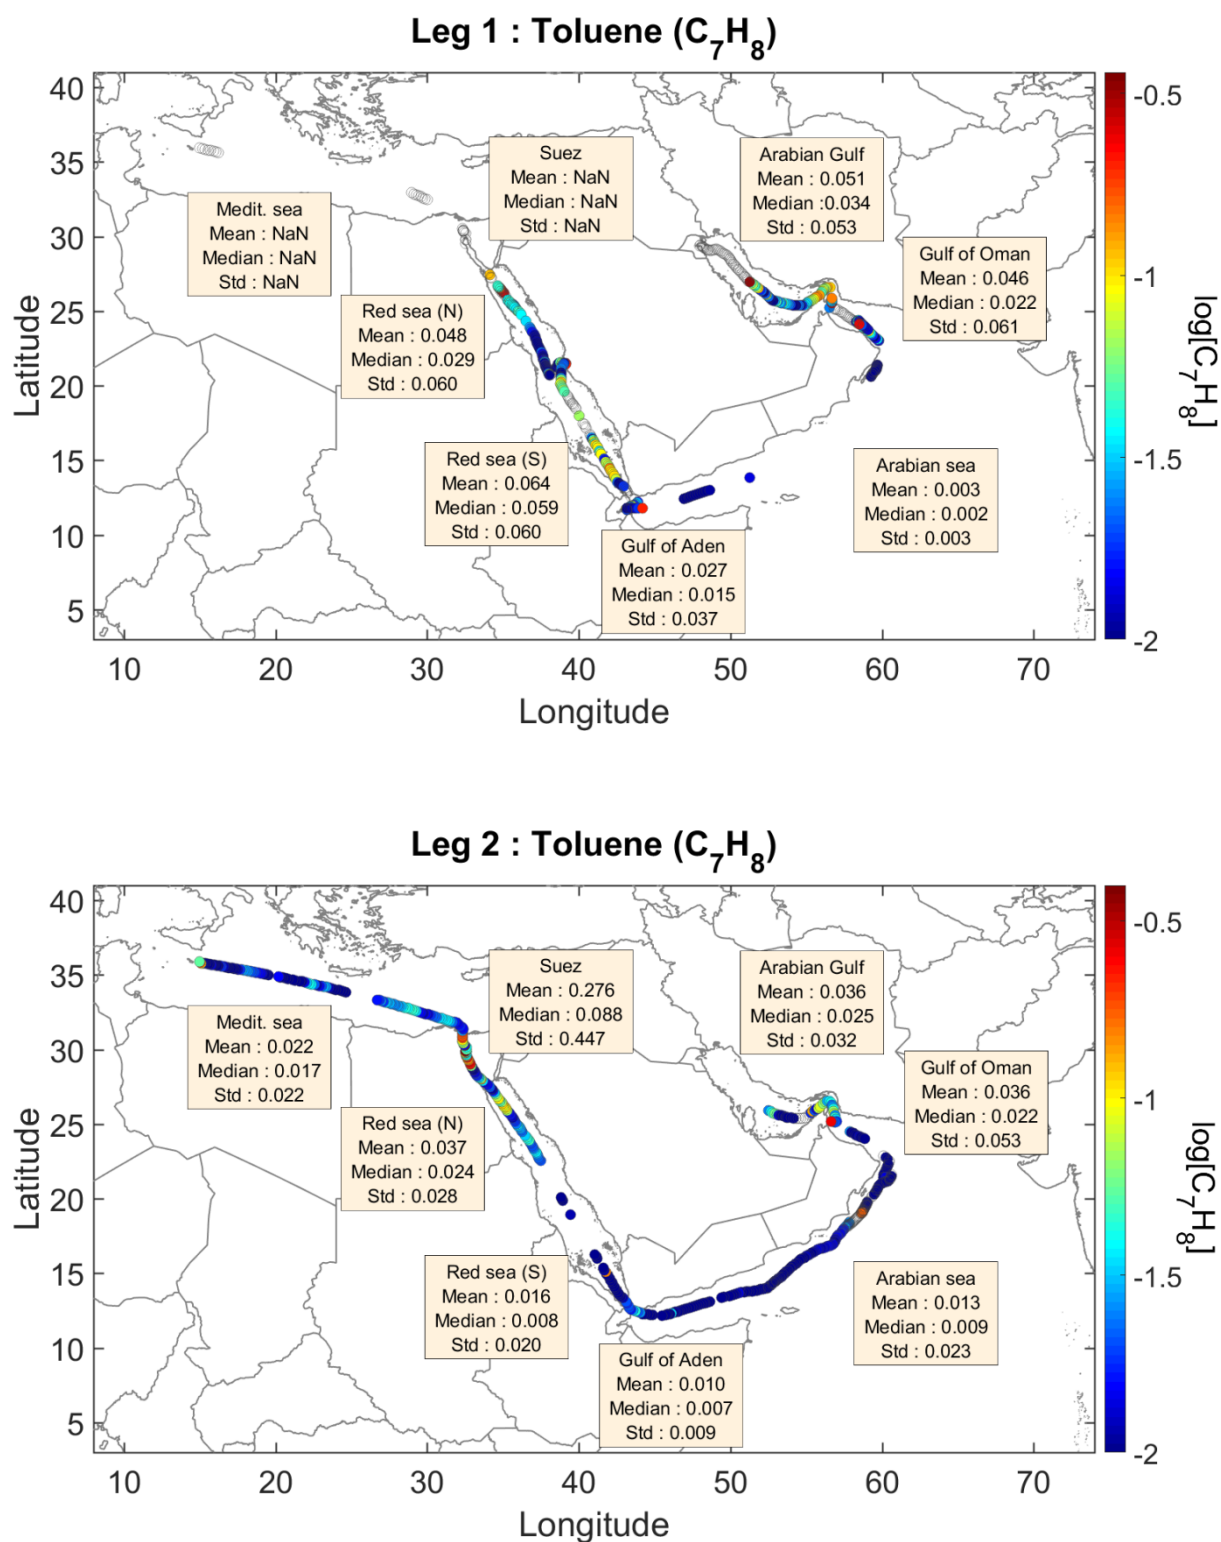

**Figure S18.** Toluene volume mixing ratios (in ppb) for leg 1 (up) and leg 2 (down). Data from periods that have been influenced by KI ship exhaust have been removed. No data were obtained at the north part of Persian Gulf for both legs.

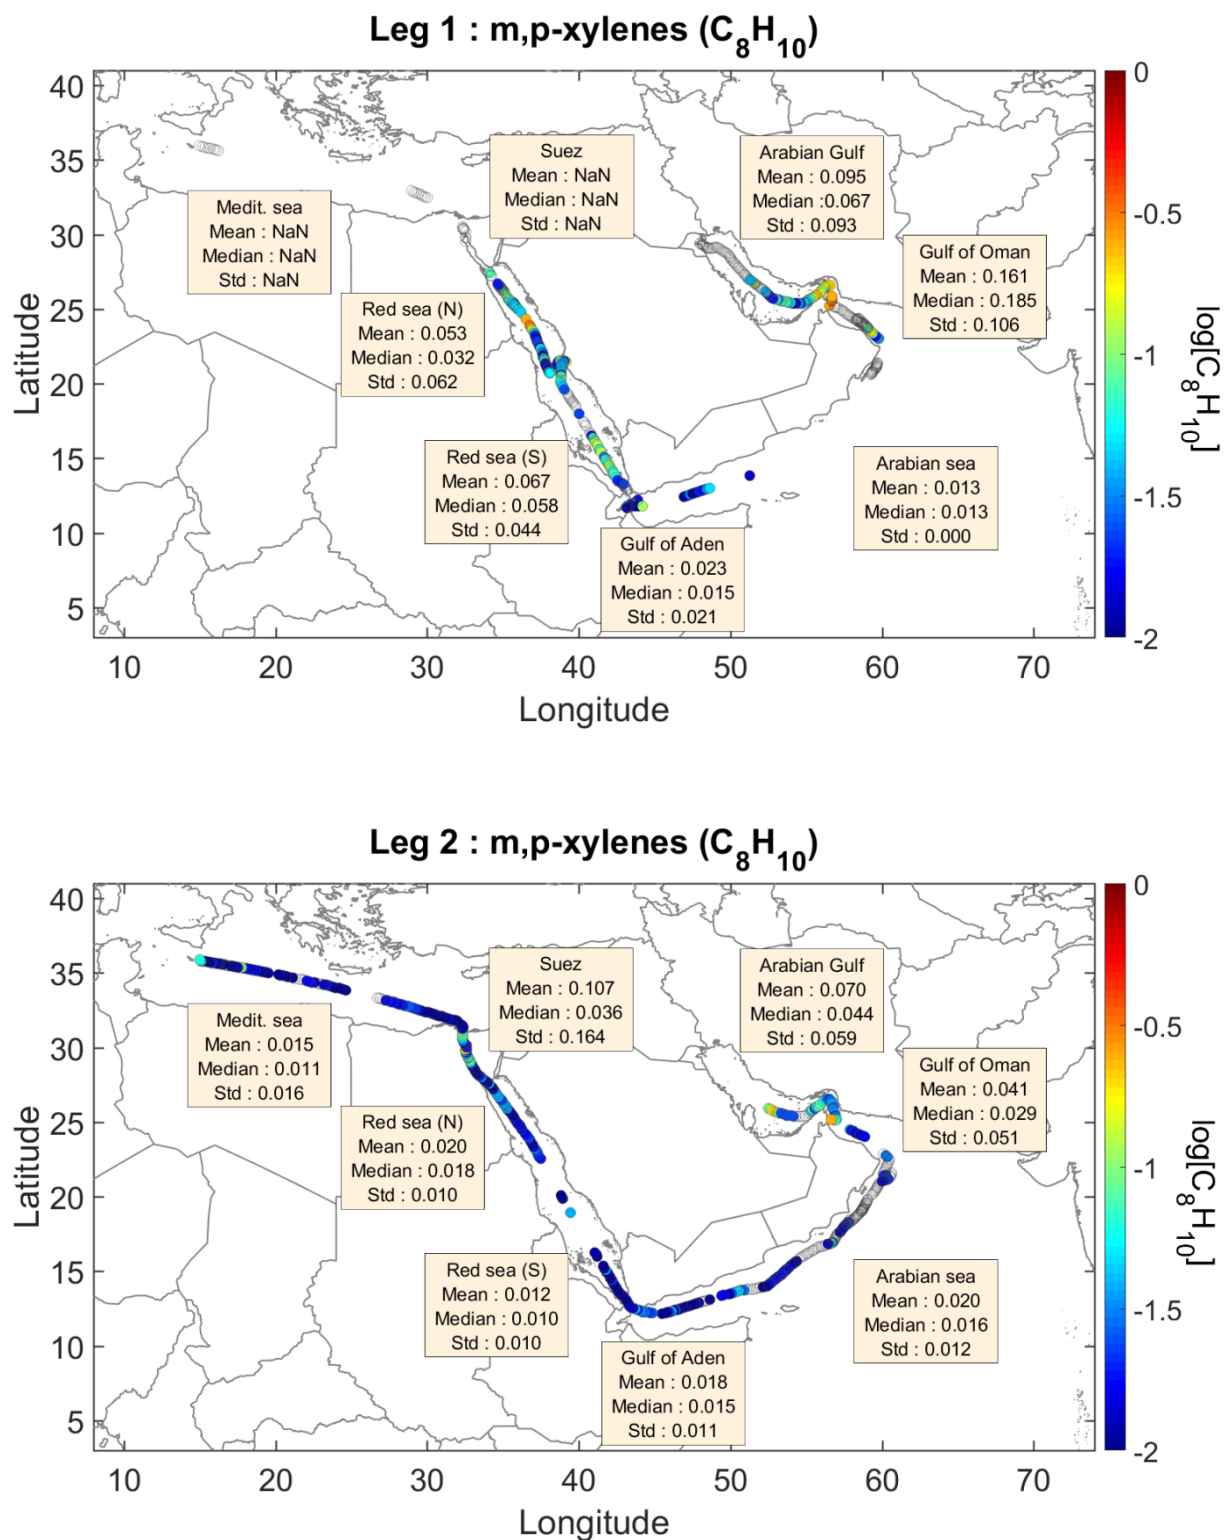

**Figure S19.** Xylene (m- + p-) volume mixing ratios (in ppb) for leg 1 (up) and leg 2 (down). Data from periods that have been influenced by KI ship exhaust have been removed. No data were obtained at the north part of Persian Gulf for both legs.

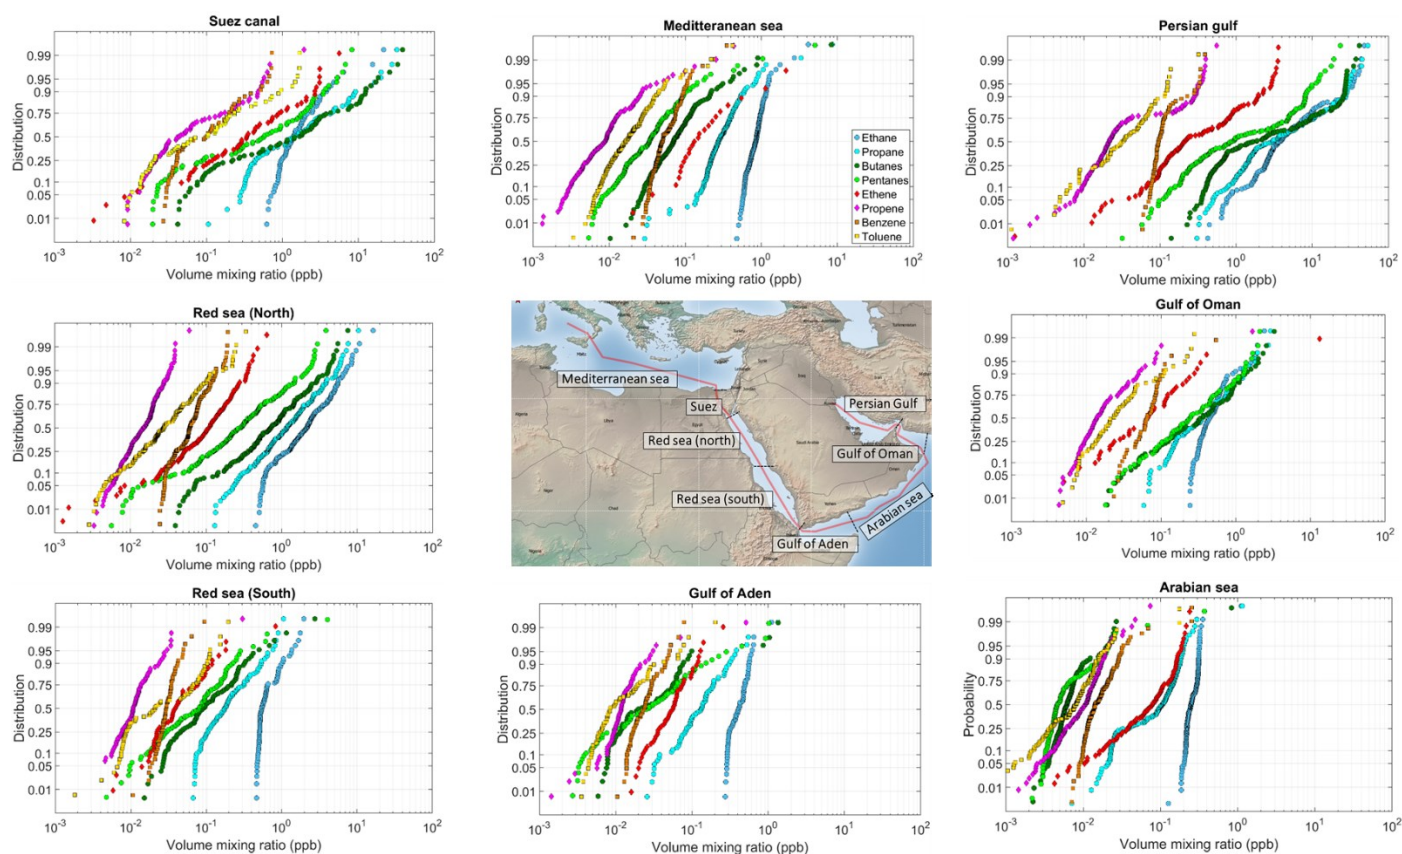

**Figure S20.** Distribution of the main NMHCs along each area.
